# Supplementary material for: Palladium-catalyzed carbonylation of allylamines via C–N bond activation leading to β,γ-unsaturated amides
Source: Royal Society of Chemistry journal article supplement (doi:10.1039/c4ra13939a), 2014-01-01

Supporting Information for:

## **Palladium-catalyzed carbonylation of allylamines via C–N bond activation leading to $\beta,\gamma$ -unsaturated amides**

Hui Yu,<sup>a</sup> Guoying Zhang,<sup>b</sup> Zong-Jian Liu<sup>a\*</sup>, and Hanmin Huang<sup>a,b\*</sup>

<sup>a</sup> *College of Chemical Engineering, Zhejiang University of Technology, Hangzhou 310024, China*

<sup>b</sup> *State Key Laboratory for Oxo Synthesis and Selective Oxidation, Lanzhou Institute of Chemical  
Physics, Chinese Academy of Sciences, Lanzhou 730000, China.*

*Fax: +86-931 4968129; Tel: +86-931 4968326; E-mail: hmhuang@licp.cas.cn*

### **CONTENTS**

- 1 General experimental details and materials**
- 2 Optimization of the reaction conditions**
- 3 General procedure for the carbonylation of allylamines**
- 4 Experimental characterization data for products**
- 5 Copies for <sup>1</sup>H NMR and <sup>13</sup>C NMR of the products**

## 1. General experiment details and materials

**Experimental:** All solvents before use were dried and degassed by standard methods and stored under argon atmosphere. NMR spectra were recorded on BRUKER DRX 400 spectrometers. Chemical shifts are reported in parts per million (ppm) down field from TMS with the solvent resonance as the internal standard. Coupling constants (J) are reported in Hz and refer to apparent peak multiplications. High resolution mass spectra (HRMS) were recorded on Bruker MicroTOF-QII mass (ESI). IR spectra were recorder on Nexus 870 FT-IR spectrometers. GC was performed on Agilent 7890 with a HP-5 column. All kinds of allylamines are known compounds and prepared according to the literature.<sup>1</sup>

## 2. Optimization of the reaction conditions

A mixture of catalyst, ligand, and allylamine was added into a teflon tube which was placed in an autoclave. Then the autoclave was purged and charged with CO at the designed pressure. The reaction mixture was stirred at the designed temperature for 15 h, and then CO was carefully released. The yield was determined by GC analysis relative to the **1** with *n*-hexadecane as internal standard.

**Table 1. Screening of the catalysts <sup>a</sup>**

| Entry | [Pd] (5 mol%)                                      | Solvent      | Yield (%) |
|-------|----------------------------------------------------|--------------|-----------|
| 1     | PdCl <sub>2</sub>                                  | NMP/THF(1/1) | 43        |
| 2     | Pd(PPh <sub>3</sub> ) <sub>2</sub> Cl <sub>2</sub> | NMP/THF(1/1) | 38        |
| 3     | Pd(DPPP)Cl <sub>2</sub>                            | NMP/THF(1/1) | 0         |
| 4     | Pd(Xantphos)Cl <sub>2</sub>                        | NMP/THF(1/1) | 82        |
| 5     | Pd(BINAP)Cl <sub>2</sub>                           | NMP/THF(1/1) | 0         |
| 6     | Pd(DPE-phos)Cl <sub>2</sub>                        | NMP/THF(1/1) | 29        |

<sup>a</sup> Reaction conditions: **1a** (0.5 mmol), CO (10 atm), [Pd] (0.025 mmol), solvent (2.0 mL), 120 °C, 15 h, yields determined by GC using *n*-hexadecane as an internal standard.

**Table 2. Screening of the solvents<sup>a</sup>**

| Entry | [Pd]                        | Solvent            | Yield (%)           |
|-------|-----------------------------|--------------------|---------------------|
| 1     | Pd(Xantphos)Cl <sub>2</sub> | NMP                | 77                  |
| 2     | Pd(Xantphos)Cl <sub>2</sub> | THF                | 87(81) <sup>b</sup> |
| 3     | Pd(Xantphos)Cl <sub>2</sub> | CH <sub>3</sub> CN | 0                   |
| 4     | Pd(Xantphos)Cl <sub>2</sub> | toluene            | 99(91) <sup>b</sup> |
| 5     | Pd(Xantphos)Cl <sub>2</sub> | xylene             | 99                  |
| 6     | Pd(Xantphos)Cl <sub>2</sub> | mesitylene         | 22                  |

<sup>a</sup> Reaction conditions: **1a** (0.5 mmol), CO (10 atm), Pd(Xantphos)Cl<sub>2</sub> (0.025 mmol), solvent (2.0 mL), 120 °C, 15 h, yields determined by GC using *n*-hexadecane as an internal standard. <sup>b</sup> Isolated yields.

**Table 3. Screening of pressure of CO <sup>a</sup>**

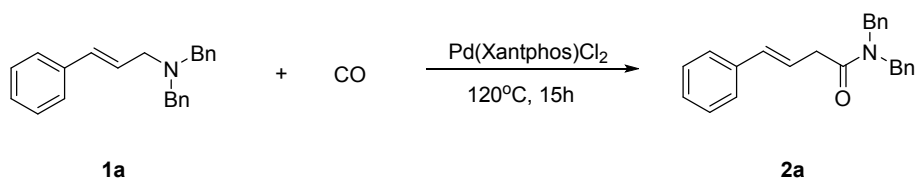

| Entry | CO (atm) | Yield (%)           |
|-------|----------|---------------------|
| 1     | 10       | 99(91) <sup>b</sup> |
| 2     | 6        | 90                  |
| 3     | 2        | 44                  |

<sup>a</sup> Reaction conditions: **1a** (0.5mmol), Pd(Xantphos)Cl<sub>2</sub> (0.025 mmol), toluene (2.0 mL), 120 °C, 15 h, yield determined by GC using *n*-hexadecane as an internal standard. <sup>b</sup> Isolated yield.

### 3. General procedure for Pd-catalyzed carbonylation of allylamines

A mixture of allylamine (0.5 mmol), Pd(Xantphos)Cl<sub>2</sub> (18.8 mg, 5% mmol), toluene (2.0 mL) was added into a teflon tube which was placed in an autoclave. Then the autoclave was purged and charged with CO at 10 atm. The reaction mixture was stirred at 120 °C for 15 h, and then CO was carefully released. The E/Z ratio of the product was determined by checking the <sup>1</sup>H NMR of crude reaction mixture. The corresponding reaction mixture was purified by flash column chromatography on a silica gel to give the desired product.

### 4. Experimental characterization data for products 2

***N,N*-dibenzyl-4-phenylbut-3-enamide (2a) (E/Z=9:1):** The title compound was

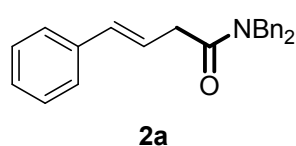

prepared according to the general procedure and purified by flash column chromatography to give white solid, 155.2 mg, 91% yield. <sup>1</sup>H NMR (400 MHz, CDCl<sub>3</sub>) δ 3.39 (t, *J* = 2.4 Hz, 2H), 4.50 (s, 2H), 4.63 (s, 2H), 6.42 (t, *J* = 2.4 Hz, 2H), 7.17-7.39 (m, 15H); <sup>13</sup>C NMR

(100 MHz, CDCl<sub>3</sub>) δ 38.0, 48.4, 50.2, 123.3, 126.4, 126.5, 127.6, 127.6, 127.8, 128.5, 128.6, 128.8, 129.1, 132.9, 136.5, 137.1, 137.4, 171.7; HRMS (ESI) calcd. for C<sub>24</sub>H<sub>23</sub>NO [M+Na]: 364.1672, found: 364.1689.

***N,N*-diethyl-4-phenylbut-3-enamide (2b) (E/Z=9:1):** The title compound was

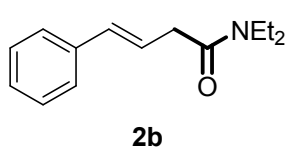

prepared according to the general procedure and purified by flash column chromatography to white solid, 100.9 mg, 93% yield. <sup>1</sup>H NMR (400 MHz, CDCl<sub>3</sub>) δ 1.06 (t, *J* = 7.2 Hz, 6H), 2.56 (q, *J* = 7.2 Hz, 4H), 3.24 (dd, *J*<sub>1</sub> = 1.2 Hz, *J*<sub>2</sub> = 6.8 Hz, 2H), 6.26-6.33 (m, 1H), 6.49

(d, *J* = 16.0 Hz, 1H), 7.19-7.39 (m, 5H); <sup>13</sup>C NMR (100 MHz, CDCl<sub>3</sub>) δ 13.2, 14.6, 38.0, 40.3, 42.3, 124.0, 126.3, 127.4, 128.6, 132.4, 137.2, 170.2; HRMS (ESI) calcd. for C<sub>14</sub>H<sub>19</sub>NO [M+Na]: 240.1359, found: 240.1369.

**4-phenyl-*N,N*-dipropylbut-3-enamide (2c) (E/Z=13:1):** The title compound was

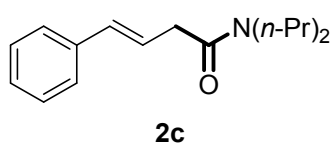

prepared according to the general procedure and purified by flash column chromatography to give white solid, 100.5 mg, 82% yield. <sup>1</sup>H NMR (400 MHz, CDCl<sub>3</sub>) δ 0.88-

0.95 (m, 6H), 1.53-1.66 (m, 4H), 3.23 (t, *J* = 8.0 Hz, 2H), 3.29 (dd, *J*<sub>1</sub> = 6.0 Hz, *J*<sub>2</sub> =

9.6 Hz, 4H), 6.35-6.48 (m, 2H), 7.19-7.38 (m, 5H);  $^{13}\text{C}$  NMR (100 MHz,  $\text{CDCl}_3$ )  $\delta$  11.4, 11.5, 21.0, 22.4, 38.0, 47.7, 49.9, 124.0, 126.3, 127.4, 128.6, 132.4, 137.2, 170.6; HRMS (ESI) calcd. for  $\text{C}_{16}\text{H}_{23}\text{NO}$   $[\text{M}+\text{Na}]$ : 268.1672, found: 268.1678.

***N,N*-diisopropyl-4-phenylbut-3-enamide (2d) (E/Z>20:1):** The title compound was

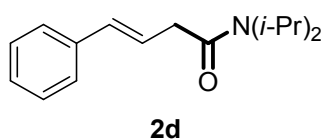

prepared according to the general procedure and purified by flash column chromatography to give white solid, 95.6 mg, 78% yield.  $^1\text{H}$  NMR (400 MHz,  $\text{CDCl}_3$ )  $\delta$  1.19 (d,  $J$  = 6.8,

6H), 1.40 (d,  $J$  = 6.8, 6H), 3.25 (d,  $J$  = 6.0 Hz, 2H), 3.47 (s, 1H), 3.97-4.03 (m, 1H), 6.33-6.48 (m, 2H), 7.18-7.38 (m, 5H);  $^{13}\text{C}$  NMR (100 MHz,  $\text{CDCl}_3$ )  $\delta$  20.8, 21.1, 40.1, 45.9, 49.0, 124.1, 126.3, 127.4, 128.6, 132.3, 137.3, 169.9; HRMS (ESI) calcd. for  $\text{C}_{16}\text{H}_{23}\text{NO}$   $[\text{M}+\text{Na}]$ : 268.1672, found: 268.1679.

***N,N*-dibutyl-4-phenylbut-3-enamide (2e) (E/Z=11:1):** The title compound was

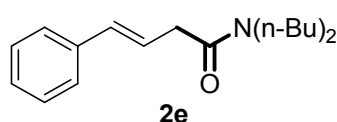

prepared according to the general procedure and purified by flash column chromatography to give white solid, 102.4 mg, 75% yield.  $^1\text{H}$  NMR (400 MHz,  $\text{CDCl}_3$ )  $\delta$

0.91-0.97(m, 6H), 1.29-1.37 (m, 4H), 1.49-1.69 (m, 4H), 3.23-3.35 (m, 6H), 6.34-6.48 (m, 2H), 7.19-7.38 (m, 5H);  $^{13}\text{C}$  NMR (100 MHz,  $\text{CDCl}_3$ )  $\delta$  14.0, 14.0, 20.3, 20.4, 30.0, 31.4, 38.1, 45.9, 48.1, 124.1, 126.4, 127.4, 128.6, 132.4, 137.3, 170.5; HRMS (ESI) calcd. for  $\text{C}_{18}\text{H}_{27}\text{NO}$   $[\text{M}+\text{Na}]$ : 296.1985, found: 296.1991.

***N,N*-dioctyl-4-phenylbut-3-enamide (2f) (E/Z=7:1):** The title compound was

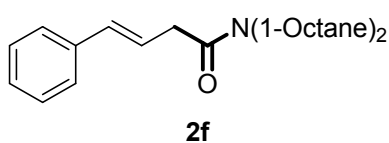

prepared according to the general procedure and purified by flash column chromatography to give white solid, 138.6 mg, 72% yield.  $^1\text{H}$  NMR (400 MHz,

$\text{CDCl}_3$ )  $\delta$  0.79 (q,  $J$  = 6.4 Hz, 6H), 1.20 (d,  $J$  = 3.6 Hz, 20H), 1.48 (t,  $J$  = 7.2 Hz, 4H), 3.14-3.25 (m, 6H), 6.28-6.40 (m, 2H), 7.11-7.30 (m, 5H);  $^{13}\text{C}$  NMR (100 MHz,  $\text{CDCl}_3$ )  $\delta$  14.2, 22.7, 22.7, 27.0, 27.1, 27.8, 29.3, 29.3, 29.3, 29.4, 29.5, 31.8, 31.9, 38.0, 46.1, 48.2, 124.0, 126.3, 127.4, 128.5, 132.4, 137.2, 170.4; HRMS (ESI) calcd. for  $\text{C}_{26}\text{H}_{43}\text{NO}$   $[\text{M}+\text{Na}]$ : 408.3237, found: 408.3232.

**4-phenyl-1-(pyrrolidin-1-yl)but-3-en-1-one (2g) (E/Z=12:1):** The title compound

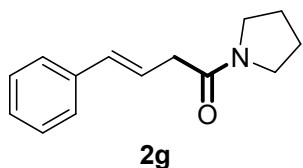

was prepared according to the general procedure and purified by flash column chromatography to give white solid, 54.8 mg, 51% yield. <sup>1</sup>H NMR (400 MHz, CDCl<sub>3</sub>) δ 1.82-1.99 (m, 4H), 3.24-3.25 (m, 2H), 3.46-3.51 (m, 4H), 6.34-6.50 (m, 2H),

7.19-7.39 (m, 5H); <sup>13</sup>C NMR (100 MHz, CDCl<sub>3</sub>) δ 24.5, 26.3, 39.6, 45.9, 46.8, 123.3, 126.3, 127.5, 128.6, 132.8, 137.2, 169.5; HRMS (ESI) calcd. for C<sub>14</sub>H<sub>17</sub>NO [M+Na]: 238.1202, found: 238.1210.

**4-phenyl-1-(piperidin-1-yl)but-3-en-1-one (2h) (E/Z=13:1):** The title compound was

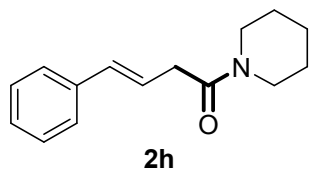

prepared according to the general procedure and purified by flash column chromatography to give white solid, 75.6 mg, 66% yield. <sup>1</sup>H NMR (400 MHz, CDCl<sub>3</sub>) δ 1.53-1.57 (m, 4H), 1.62-1.66 (m, 2H), 3.30 (dd, *J*<sub>1</sub> = 1.6 Hz, *J*<sub>2</sub> = 6.8 Hz,

2H), 3.44 (t, *J* = 5.6 Hz, 2H), 3.58 (t, *J* = 5.6 Hz, 2H), 6.30-6.38 (m, 1H), 6.45 (d, *J* = 16.0 Hz, 1H), 7.20-7.38 (m, 5H); <sup>13</sup>C NMR (100 MHz, CDCl<sub>3</sub>) δ 24.6, 25.7, 26.7, 38.3, 43.0, 47.2, 123.6, 126.3, 127.5, 128.6, 132.6, 137.2, 169.3; HRMS (ESI) calcd. for C<sub>15</sub>H<sub>19</sub>NO [M+Na]: 252.1359, found: 252.1364

**1-morpholino-4-phenylbut-3-en-1-one (2i) (E/Z=19:1):** The title compound was

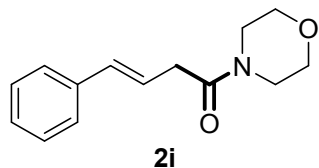

prepared according to the general procedure and purified by flash column chromatography to give white solid, 95.9 mg, 83 % yield. <sup>1</sup>H NMR (400 MHz, CDCl<sub>3</sub>) δ 3.30 (dd, *J*<sub>1</sub> = 1.6 Hz, *J*<sub>2</sub> = 6.8 Hz, 2H), 3.51 (t, *J* = 5.2 Hz, 2H), 3.65-3.68

(m, 6H), 6.29-6.36 (m, 1H), 6.46 (d, *J* = 16.0 Hz, 1H), 7.21-7.38 (m, 5H); <sup>13</sup>C NMR (100 MHz, CDCl<sub>3</sub>) δ 37.9, 42.2, 46.4, 66.8, 67.0, 122.8, 126.4, 127.7, 128.7, 133.1, 136.9, 169.7; HRMS (ESI) calcd. for C<sub>14</sub>H<sub>17</sub>NO<sub>2</sub> [M+Na]: 254.1151, found: 254.1155

**N-benzyl-4-phenyl-N-propylbut-3-enamide (2j) (E/Z=7:1):** The title compound was

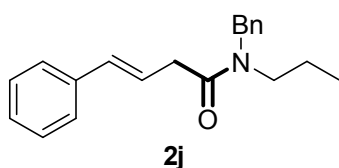

prepared according to the general procedure and purified by flash column chromatography to give white solid, 92.3 mg, 63% yield. <sup>1</sup>H NMR (400 MHz, CDCl<sub>3</sub>) δ 0.87-0.92

(m, 3H), 1.56-1.63 (m, 2H), 3.18-3.38 (m, 4H), 4.58 (s, 1H), 4.63 (s, 1H), 6.36-6.47 (m, 2H), 7.18-7.38 (m, 10H);  $^{13}\text{C}$  NMR (100 MHz,  $\text{CDCl}_3$ )  $\delta$  11.4, 11.5, 20.9, 22.0, 37.9, 38.2, 48.2, 48.4, 49.0, 51.4, 123.6, 123.7, 126.3, 126.4, 126.4, 127.4, 127.5, 127.5, 127.7, 128.2, 128.6, 128.6, 128.7, 129.1, 132.7, 137.1, 137.2, 137.9, 171.1, 171.4; HRMS (ESI) calcd. for  $\text{C}_{20}\text{H}_{23}\text{NO}$   $[\text{M}+\text{Na}]$ : 316.1672, found: 316.1678

**(E)-N,N-dibenzyl-4-p-tolylbut-3-enamide (2k) (E/Z=7:1):** The title compound was

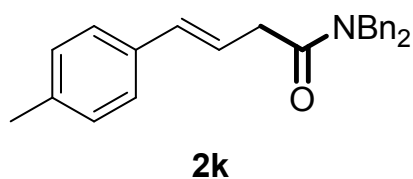

prepared according to the general procedure and purified by flash column chromatography to give white solid, 133.1 mg, 75 % yield.  $^1\text{H}$  NMR (400 MHz,  $\text{CDCl}_3$ )  $\delta$  2.30 (s, 0.43H), 2.32 (s, 2.32H), 3.37-3.38 (m, 1.69H), 3.45-3.46 (m, 0.23H), 4.45

(s, 0.25H), 4.49 (s, 1.75H), 4.62-4.64 (m, 2H), 6.22-6.42 (m, 2H), 6.99-7.31 (m, 14H);  $^{13}\text{C}$  NMR (100 MHz,  $\text{CDCl}_3$ )  $\delta$  21.3, 38.1, 48.4, 50.2, 122.2, 126.3, 126.6, 127.6, 127.8, 128.5, 128.8, 129.1, 129.3, 132.8, 134.3, 136.6, 137.3, 137.4, 171.9; HRMS (ESI) calcd. for  $\text{C}_{25}\text{H}_{25}\text{NO}$   $[\text{M}+\text{Na}]$ : 378.1828, found: 378.1831

**N,N-dibenzyl-4-m-tolylbut-3-enamide (2l) (E/Z>20:1):** The title compound was

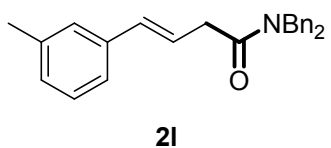

prepared according to the general procedure and purified by flash column chromatography to give white solid, 129.6 mg, 73% yield.  $^1\text{H}$  NMR (400 MHz,  $\text{CDCl}_3$ )  $\delta$  2.32 (s, 3H), 3.37 (d,  $J$  = 4.8 Hz, 2H), 4.49 (s, 2H), 4.63 (s, 2H), 6.39-6.41 (m, 2H), 7.02-7.39 (m, 14H);  $^{13}\text{C}$  NMR (100 MHz,  $\text{CDCl}_3$ )  $\delta$  21.5, 38.0, 48.4, 50.2, 123.1, 123.6, 126.5, 127.1,

127.6, 127.8, 128.3, 128.5, 128.5, 128.8, 129.1, 133.0, 136.5, 137.0, 137.4, 138.1, 171.8; HRMS (ESI) calcd. for  $\text{C}_{25}\text{H}_{25}\text{NO}$   $[\text{M}+\text{Na}]$ : 378.1828, found: 378.1839.

**N,N-dibenzyl-4-(4-tert-butylphenyl)but-3-enamide (2m) (E/Z=6:1):** The title compound was prepared according to the general procedure and purified by flash column chromatography to give white solid, 151.0 mg, 76% yield.  $^1\text{H}$  NMR (400 MHz,  $\text{CDCl}_3$ )  $\delta$  1.30 (s, 9H), 3.37 (d,  $J$  = 4.8 Hz, 2H), 4.48 (s, 2H), 4.62 (s, 2H), 6.37 (d,  $J$  = 7.2 Hz, 2H), 7.16-7.38 (m, 14H);  $^{13}\text{C}$  NMR (100 MHz,  $\text{CDCl}_3$ )  $\delta$  31.4, 34.7, 38.1, 48.4,



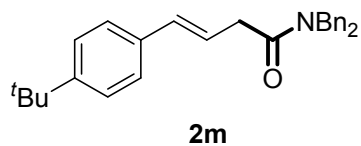

50.2, 122.4, 125.5, 126.1, 126.6, 127.6, 127.8, 128.5, 128.8, 129.1, 132.7, 134.3, 136.6, 137.4, 150.7, 171.8; **HRMS** (ESI) calcd. for  $C_{28}H_{31}NO$   $[M+Na]$ : 420.2298, found: 420.2284.

***N,N*-dibenzyl-4-(4-methoxyphenyl)but-3-enamide (2n) (E/Z=6:1):** The title compound was prepared according to the general procedure and purified by flash

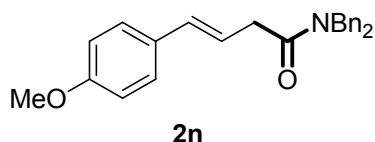

column chromatography to give white solid, 137.3 mg, 74% yield. **<sup>1</sup>H NMR** (400 MHz,  $CDCl_3$ )  $\delta$  3.35-3.37 (m, 2H), 3.79 (s, 3H), 4.49 (s, 2H), 4.62 (s, 2H), 6.23-6.38 (m, 2H), 6.81-6.85 (m, 2H), 7.17-7.39 (m, 12H); **<sup>13</sup>C NMR** (100 MHz,  $CDCl_3$ )  $\delta$  38.0, 48.4, 50.2, 55.4, 114.0, 121.0, 126.5, 127.5, 127.6, 127.8, 128.5, 128.7, 129.1, 129.9, 132.3, 136.6, 137.4, 159.2, 171.9; **HRMS** (ESI) calcd. for  $C_{25}H_{25}NO_2$   $[M+Na]$ : 394.1778, found: 394.1781.

***N,N*-dibenzyl-4-(4-ethoxyphenyl)but-3-enamide (2o) (E/Z=14:1):** The title compound was prepared according to the general

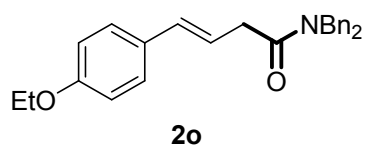

procedure and purified by flash column chromatography to give white solid, 142.5 mg, 74% yield. **<sup>1</sup>H NMR** (400 MHz,  $CDCl_3$ )  $\delta$  1.40 (t,  $J$  = 7.2 Hz, 3H), 3.35 (d,  $J$  = 6.4 Hz, 2H), 4.00 (q,  $J$  = 6.8 Hz, 2H), 4.49 (s, 2H), 4.62 (s, 2H), 6.22-6.38 (m, 2H), 6.80 (d,  $J$  = 8.4 Hz, 2H), 7.16-7.38 (m, 12H); **<sup>13</sup>C NMR** (100 MHz,  $CDCl_3$ )  $\delta$  14.9, 38.0, 48.4, 50.2, 63.5, 114.6, 120.8, 126.5, 127.5, 127.6, 127.8, 128.5, 128.7, 129.1, 129.8, 132.4, 136.6, 137.4, 158.6, 171.9; **HRMS** (ESI) calcd. for  $C_{26}H_{27}NO_2$   $[M+Na]$ : 408.1934, found: 408.1931.

***N,N*-dibenzyl-4-(4-fluorophenyl)but-3-enamide (2p) (E/Z=8:1):** The title compound was prepared according to the general procedure and

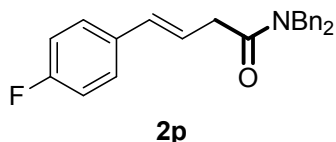

purified by flash column chromatography to give white solid, 154.4 mg, 86% yield. **<sup>1</sup>H NMR** (400 MHz,  $CDCl_3$ )  $\delta$  3.63 (d,  $J$  = 4.8 Hz, 2H), 4.49 (s, 2H), 4.63 (s, 2H), 6.33-6.35 (m, 2H), 6.98-6.99 (m, 2H), 7.17-7.39 (m, 14H); **<sup>13</sup>C NMR** (100 MHz,  $CDCl_3$ )  $\delta$  37.8, 48.6, 50.3, 115.4, 115.6, 123.1, 123.1, 126.5, 127.7, 127.8, 127.9, 127.9, 128.6, 128.8, 129.2, 131.8, 133.3, 133.3, 136.5, 137.4, 171.7; **HRMS** (ESI) calcd. for

C<sub>24</sub>H<sub>23</sub>FNO [M+H]: 360.1758, found: 360.1762.

***N,N*-dibenzyl-4-(4-chlorophenyl)but-3-enamide (2q) (E/Z=7:1):** The title compound

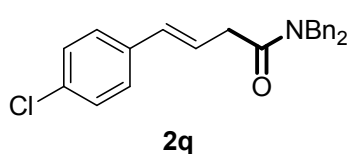

was prepared according to the general procedure and purified by flash column chromatography to give white solid, 144.4 mg, 77% yield. <sup>1</sup>H NMR (400 MHz, CDCl<sub>3</sub>)

δ 3.37 (d, *J* = 5.6 Hz, 2H), 4.49 (s, 2H), 4.63 (s, 2H), 6.32-6.43 (m, 2H), 7.17-7.39 (m, 14H); <sup>13</sup>C NMR (100 MHz, CDCl<sub>3</sub>) δ 37.8, 48.6, 50.2, 124.1, 126.5, 127.6, 127.7, 127.9, 128.6, 128.8, 129.2, 131.7, 133.2, 135.6, 136.5, 137.3, 171.6; HRMS (ESI) calcd. for C<sub>24</sub>H<sub>22</sub>ClNO [M+Na]: 398.1282, found: 398.1289.

**(E)-4-(4-(dibenzylamino)-4-oxobut-1-enyl)phenyl acetate (E/Z= 9:1):** The title

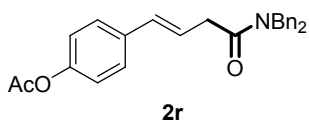

compound was prepared according to the general procedure and purified by flash column chromatography to give white solid, 165.6 mg, 83 % yield. <sup>1</sup>H NMR (400 MHz, CDCl<sub>3</sub>) δ

2.19 (s, 3H), 3.28-3.29 (m, 1.8H), 3.81-3.40 (m, 0.2H), 4.40 (s, 2H), 4.54 (s, 2H), 6.15-6.19 (m, 0.11H), 6.28-6.30 (m, 1.73H), 6.72-6.73 (m, 0.15H), 6.72-7.30 (m, 14H); <sup>13</sup>C NMR (100 MHz, CDCl<sub>3</sub>) δ 21.2, 27.0, 37.8, 48.4, 50.2, 121.7, 123.5, 126.5, 127.2, 127.6, 127.8, 128.5, 128.7, 129.1, 131.9, 134.9, 136.5, 137.3, 150.0, 169.5, 171.6; HRMS (ESI) calcd. for C<sub>26</sub>H<sub>25</sub>NO<sub>3</sub> [M+Na]: 422.1727, found: 422.1738

***N,N*-dibenzyl-4-(naphthalen-2-yl)but-3-enamide (2s) (E/Z=13:1):** The title

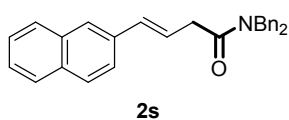

compound was prepared according to the general procedure and purified by flash column chromatography to give white solid, 164.2 mg, 84% yield. <sup>1</sup>H NMR (400 MHz, CDCl<sub>3</sub>) δ

3.43 (t, *J* = 2.4 Hz, 2H), 4.52 (s, 2H), 4.64 (s, 2H), 6.54-6.56 (m, 2H), 7.18-7.79 (m, 17H); <sup>13</sup>C NMR (100 MHz, CDCl<sub>3</sub>) δ 38.1, 48.5, 50.3, 123.7, 125.9, 126.1, 126.3, 126.6, 127.6, 127.8, 127.8, 128.1, 128.3, 128.6, 128.8, 129.2, 133.1, 133.7, 134.6, 136.5, 137.4, 171.8; HRMS (ESI) calcd. for C<sub>28</sub>H<sub>25</sub>NO [M+Na]: 414.1828, found: 414.1841.

**(E)-*N,N*-dibenzylpent-3-enamide 2t (E/Z=3:1):** The title compound was prepared

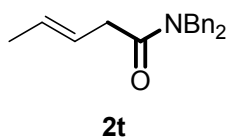

according to the general procedure and purified by flash column chromatography to give white solid, 93.5 mg, 67% yield. **<sup>1</sup>H NMR** (400 MHz, CDCl<sub>3</sub>) δ 1.56-1.70 (m, 3H), 3.15-3.23 (m, 2H), 4.44 (s, 2H), 4.59 (d, *J* = 6.8 Hz, 2H), 5.48-5.69 (m, 2H), 7.14-7.38 (m, 10H); **<sup>13</sup>C NMR** (100 MHz, CDCl<sub>3</sub>) δ 13.2, 18.1, 32.5, 37.7, 48.2, 48.3, 50.0, 123.2, 124.1, 126.5, 126.5, 127.0, 127.5, 127.7, 128.4, 128.5, 128.7, 128.9, 129.0, 136.6, 137.5, 172.2, 172.3; **HRMS** (ESI) calcd. for C<sub>23</sub>H<sub>24</sub>N [M+1]: 302.1515, found: 302.1530.

**References:**

1. Y. Xie, J. Hu, Y. Wang, C. Xia, H. Huang, *J. Am. Chem. Soc.* 2012, **134**, 20613.

**6 Copies for <sup>1</sup>H NMR and <sup>13</sup>C NMR of the products**

ZGY-130708-1-HNMR

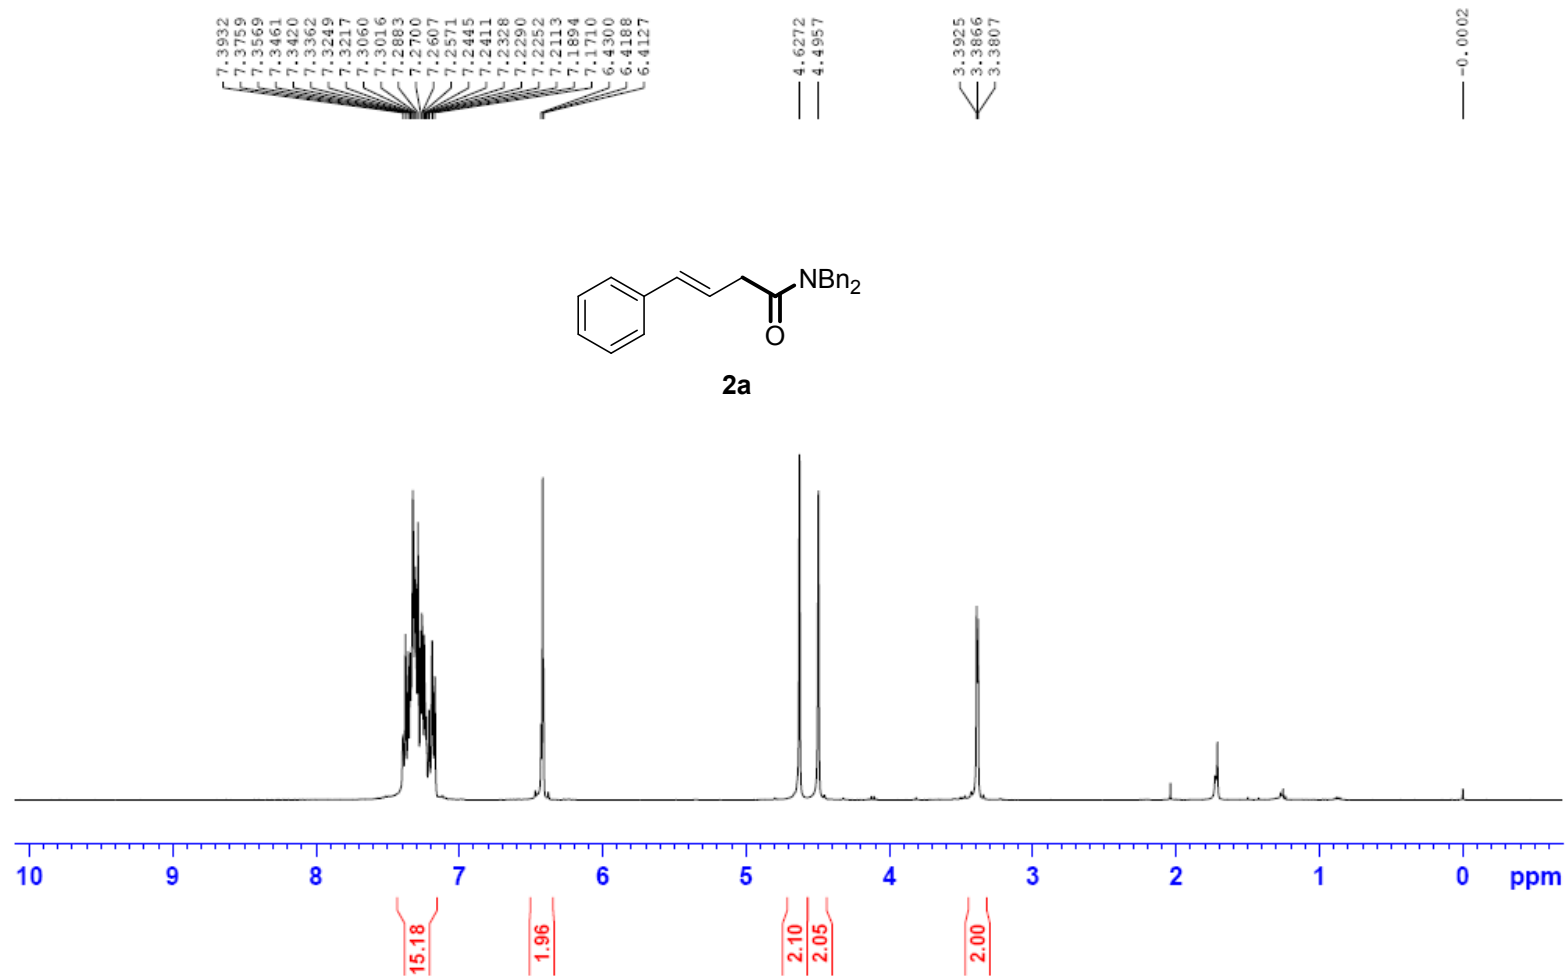

ZGY-130708-1-CNMR

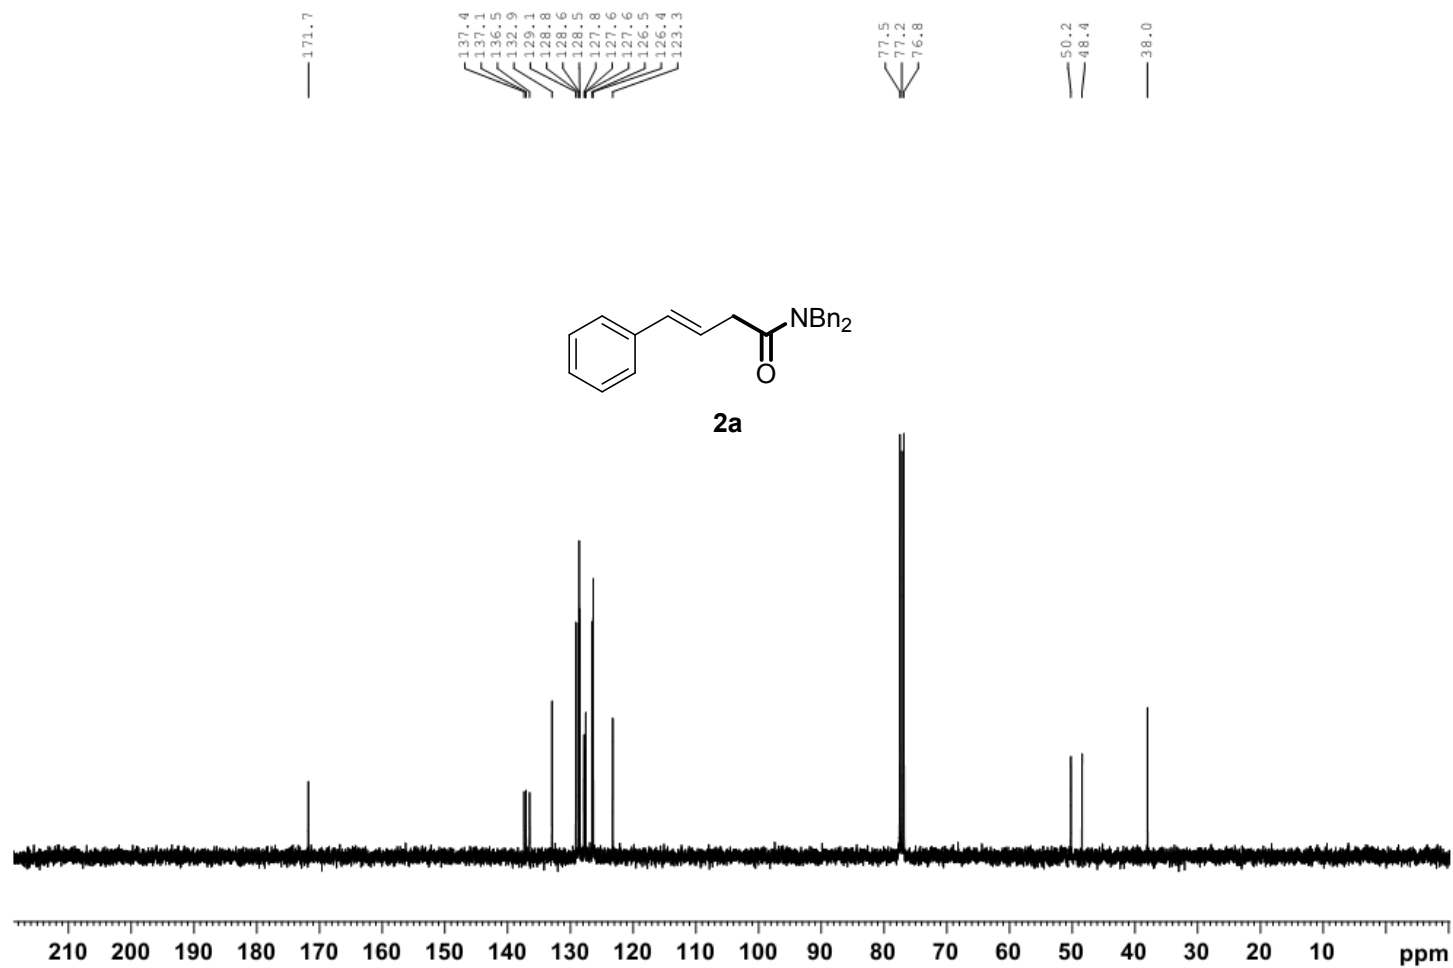

ZGY-130715-1-HNMR

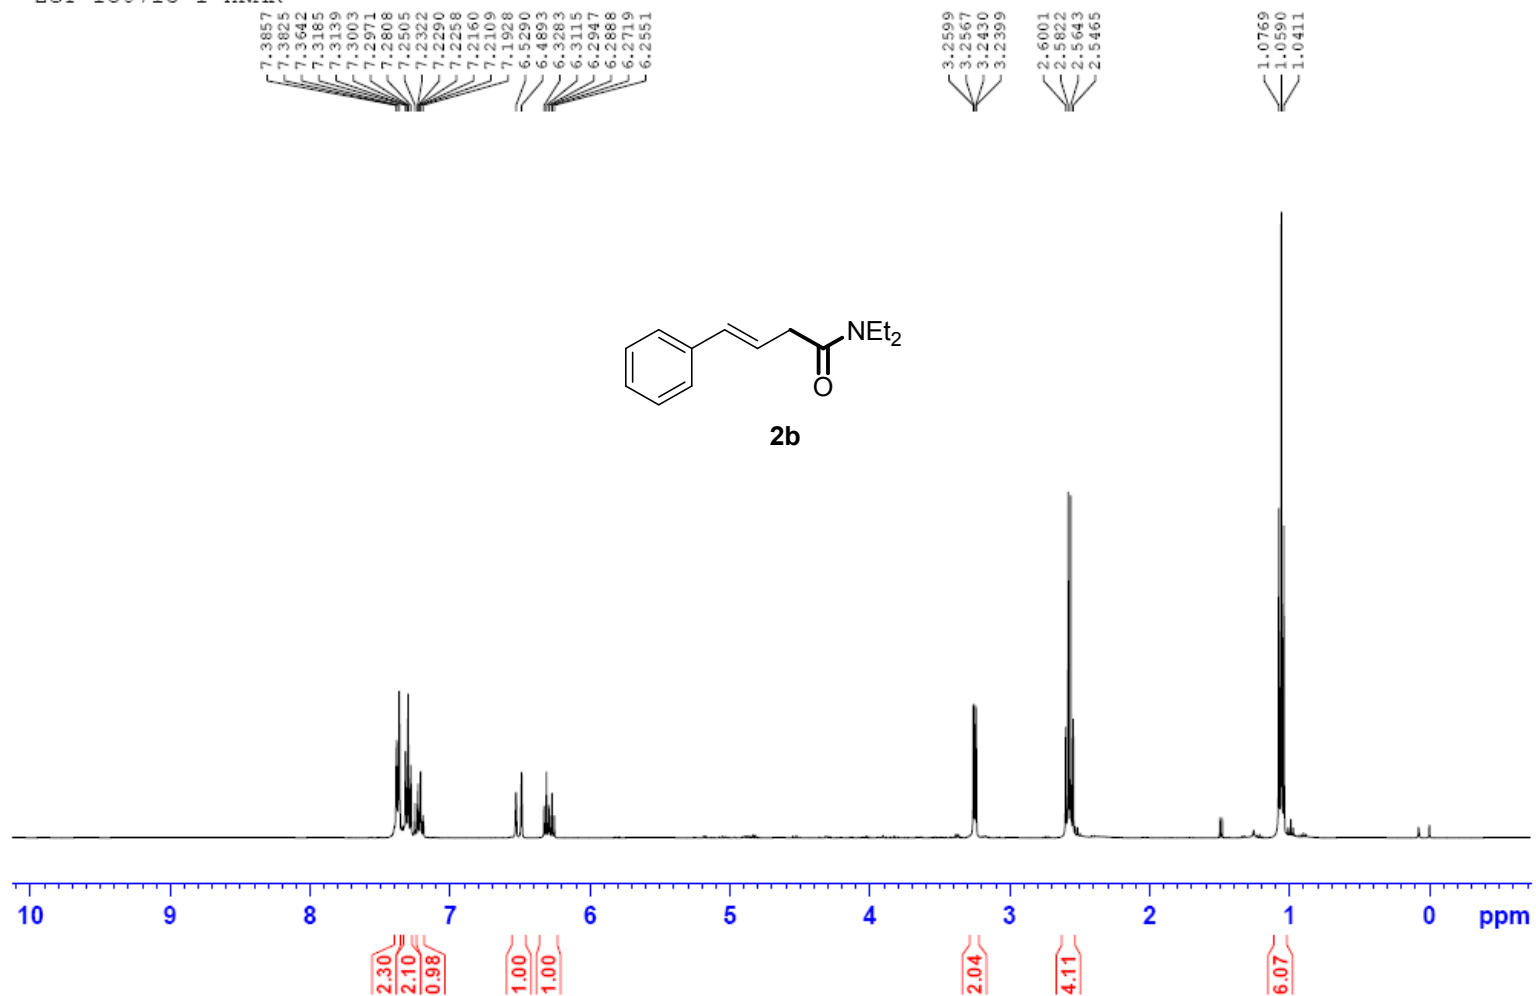

YH-140303-1-CNMR

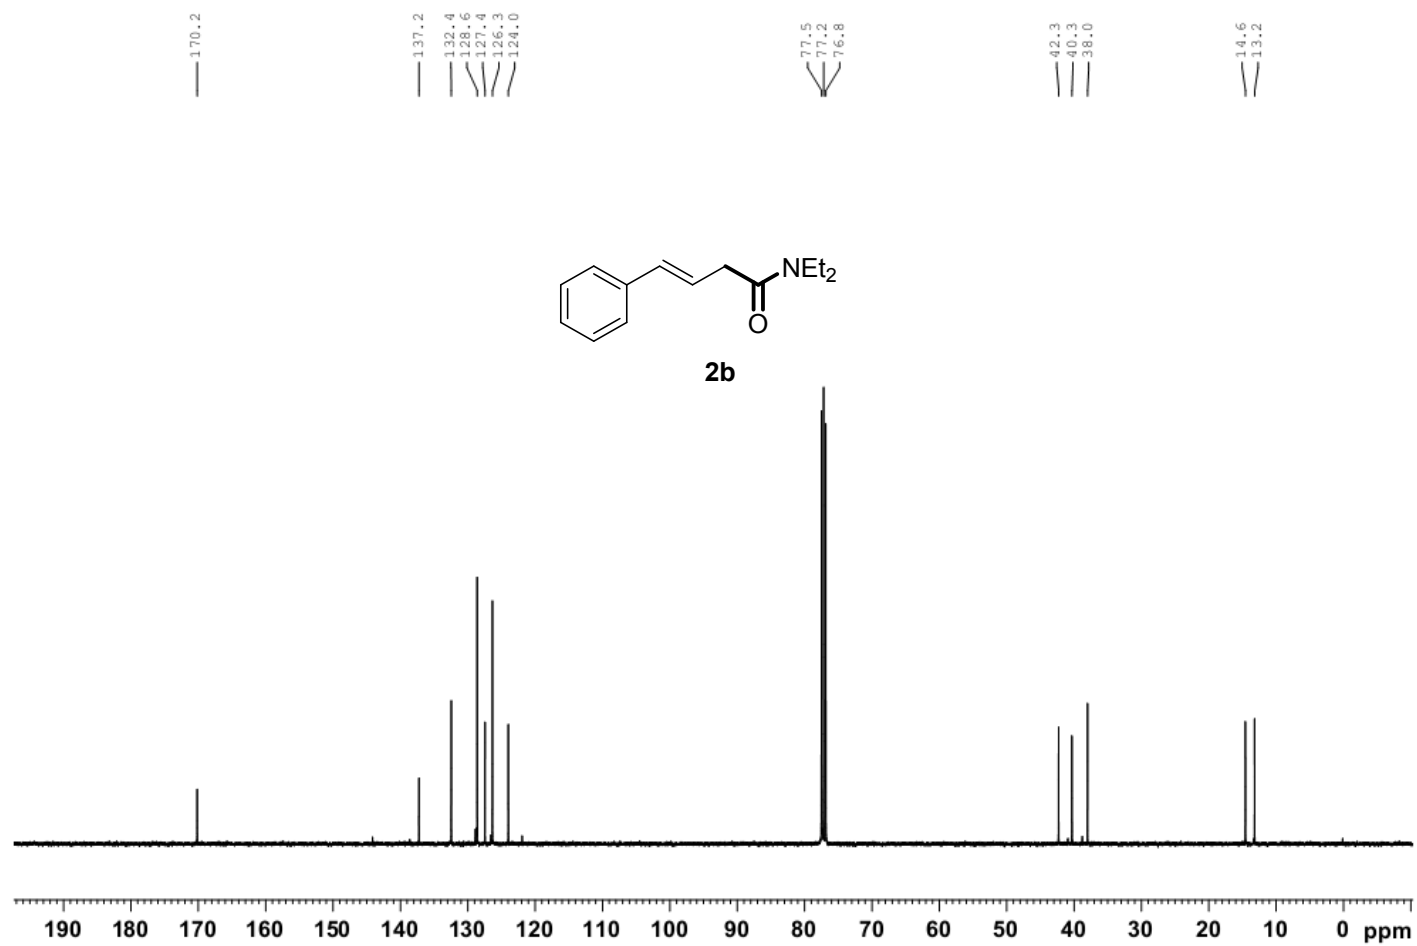

ZGY-130715-2-HNMR

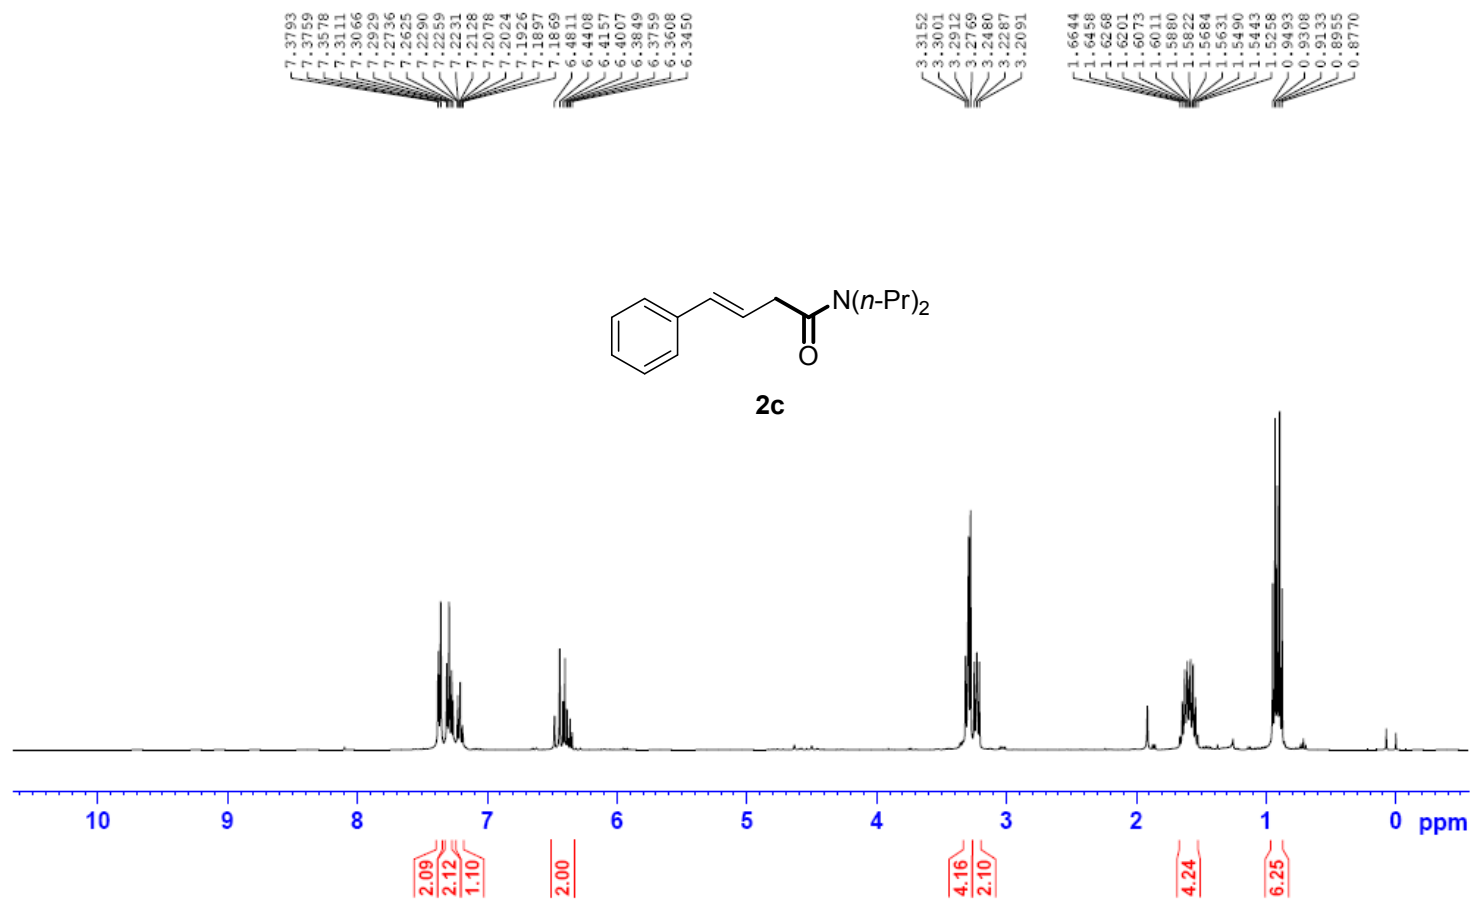



ZGY-130715-2-CNMR

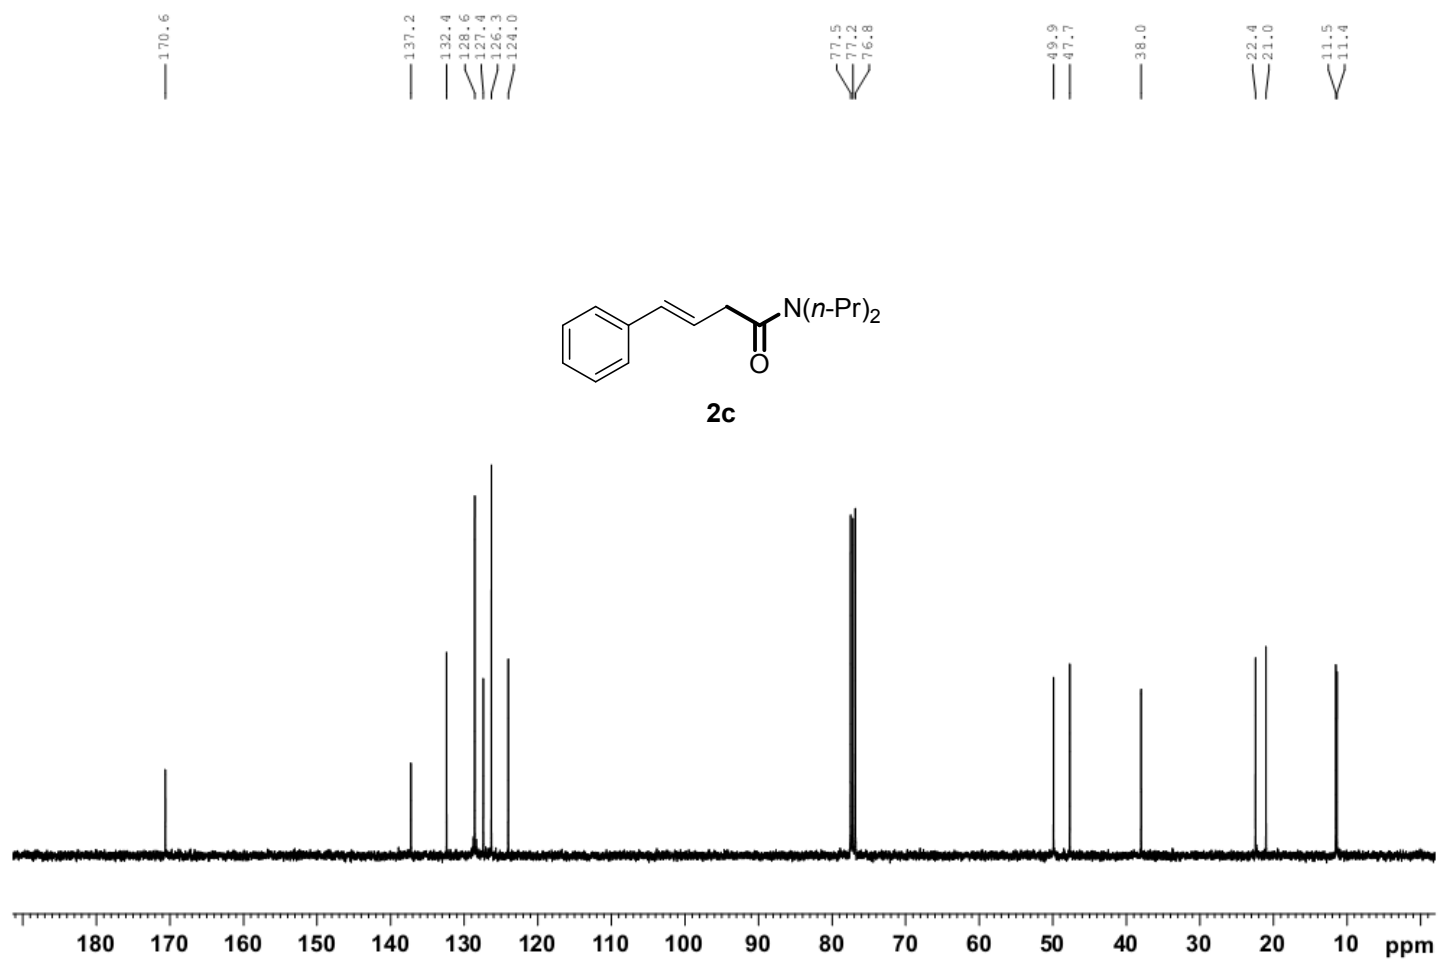

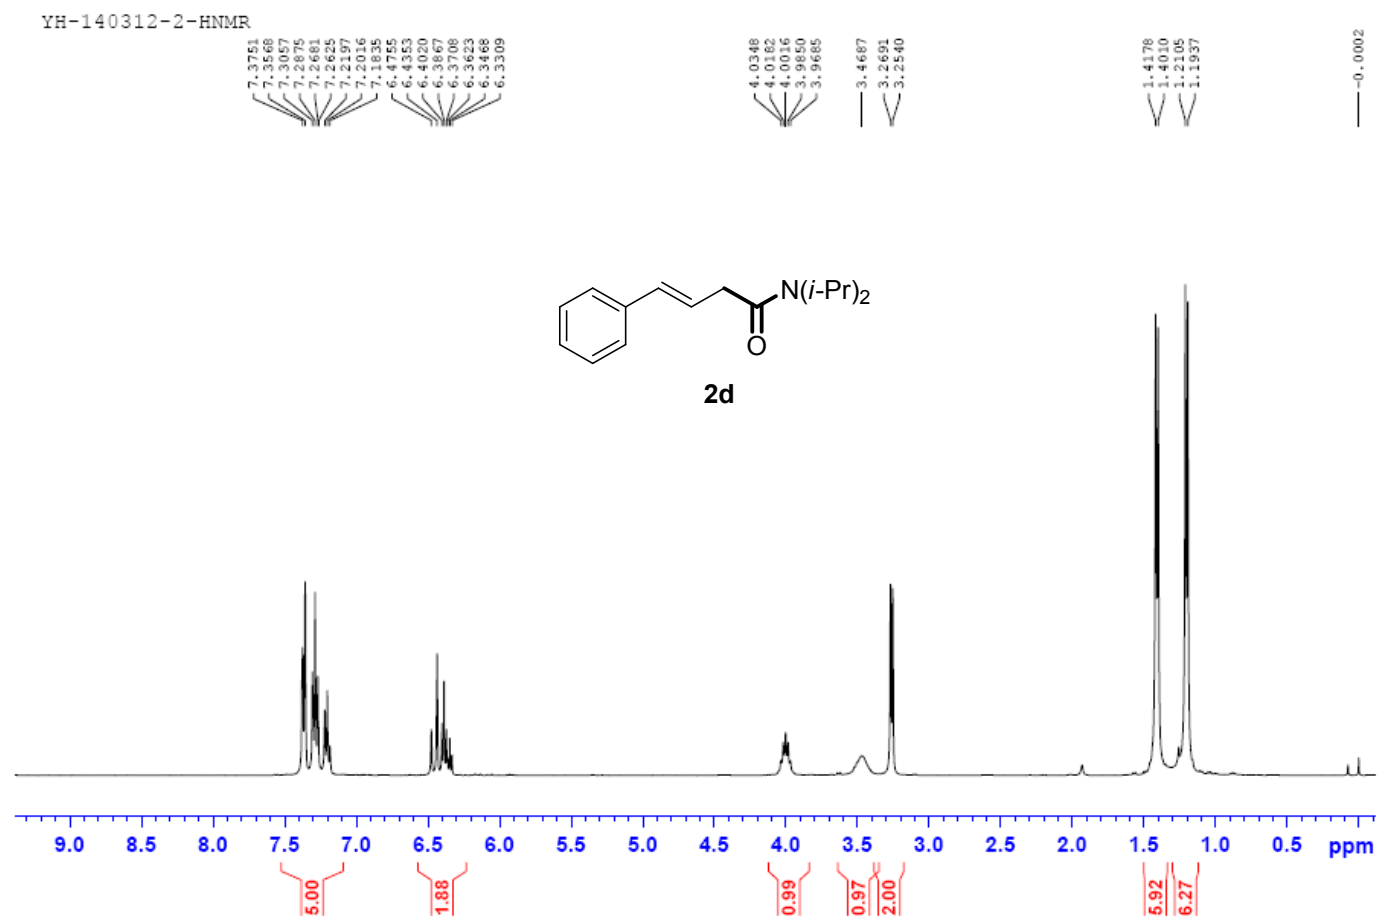

YH-140312-2-CNMR

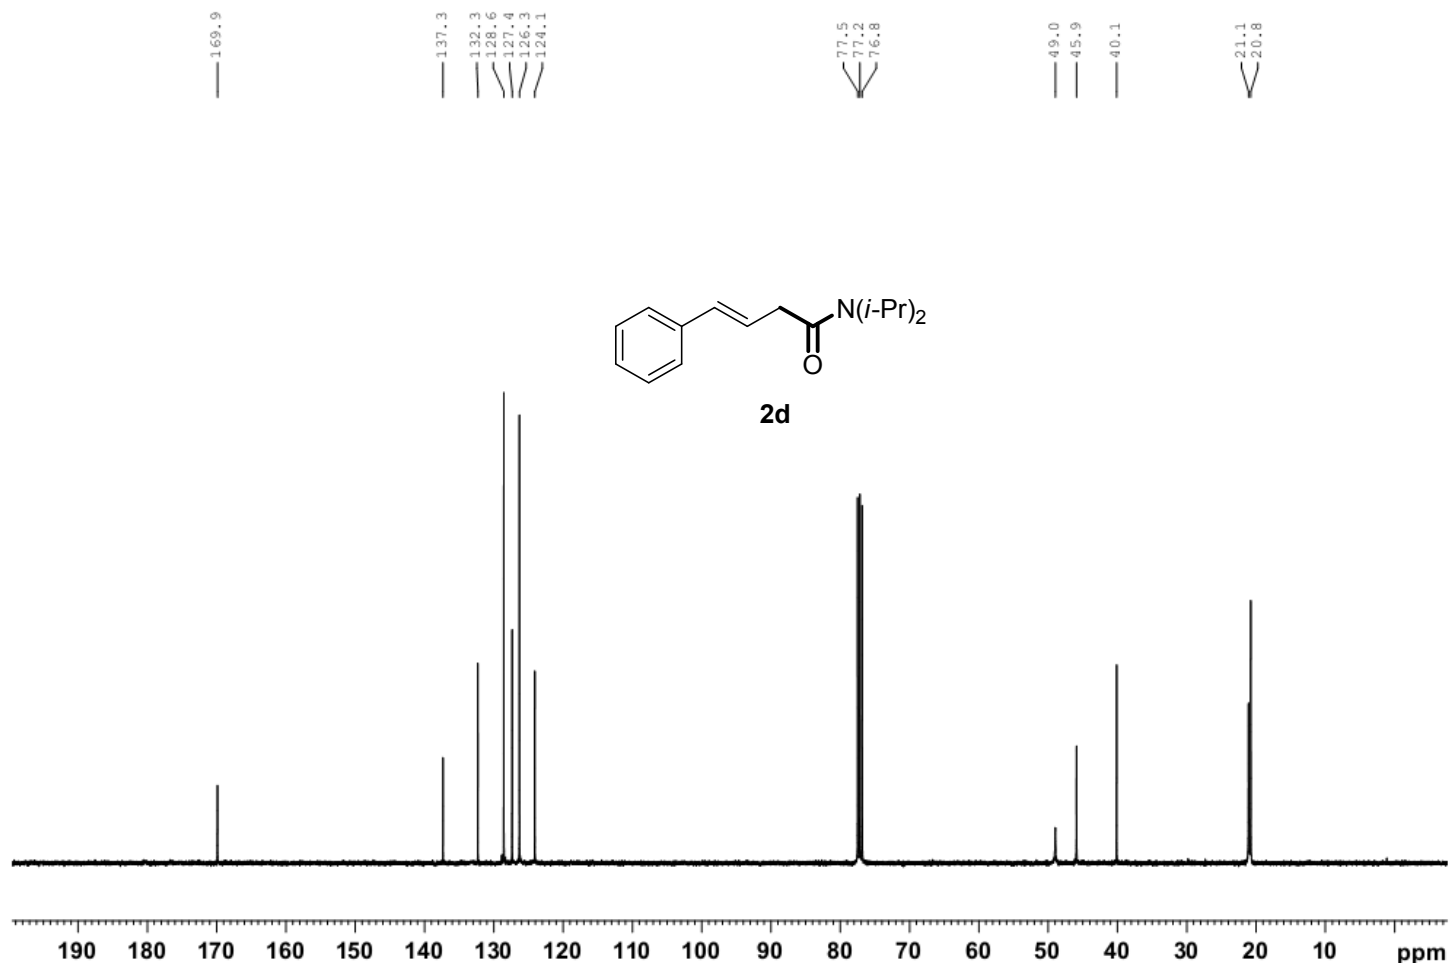

YH-140723-2-HNMR

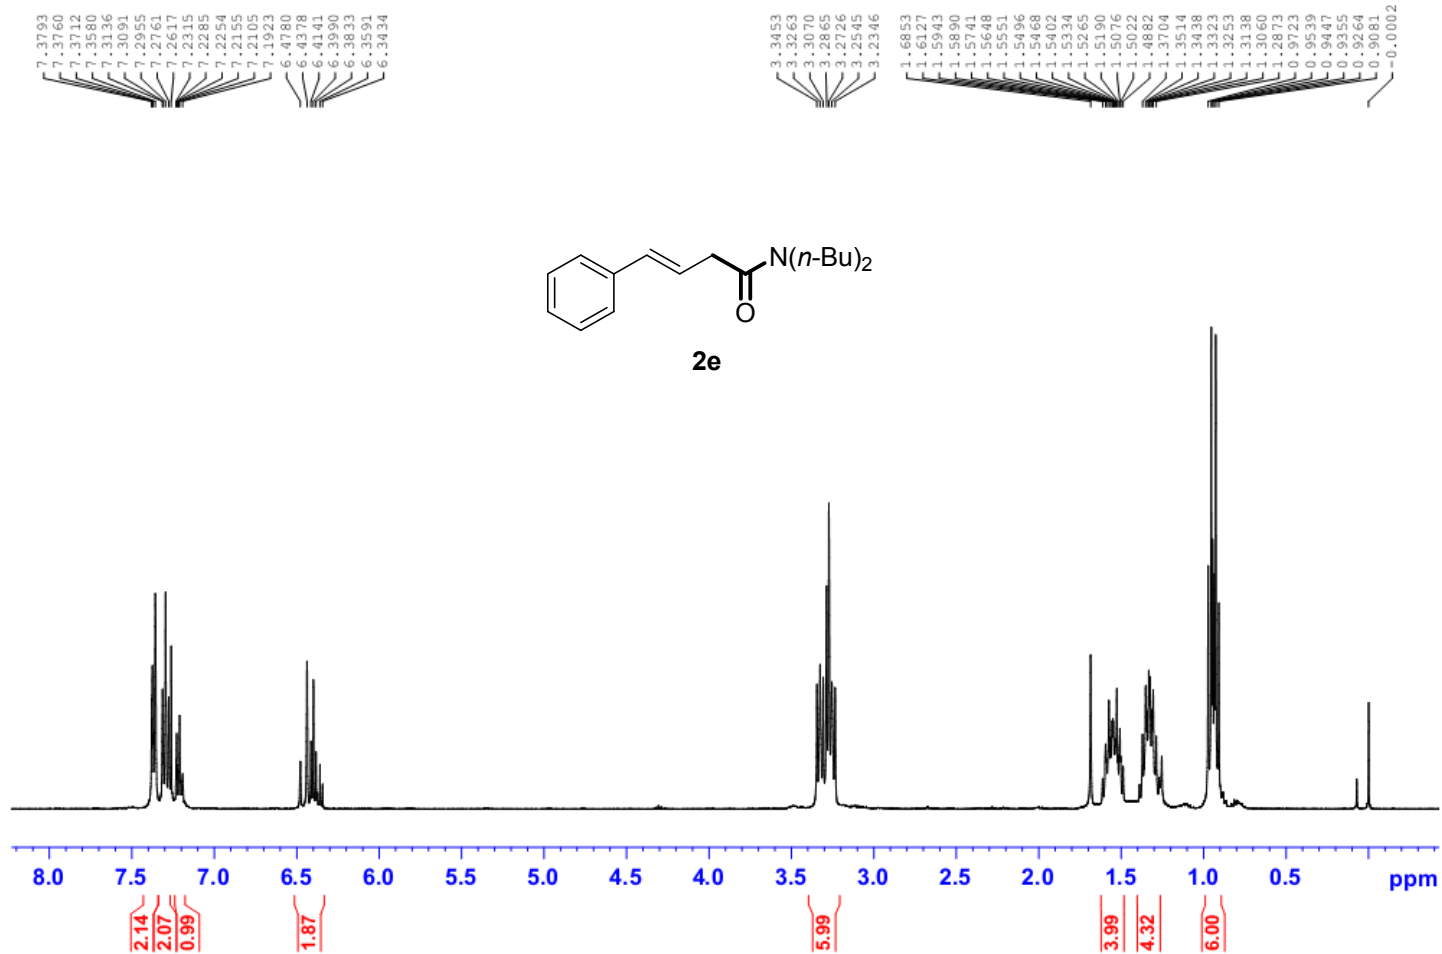

YH-140723-2-CNMR

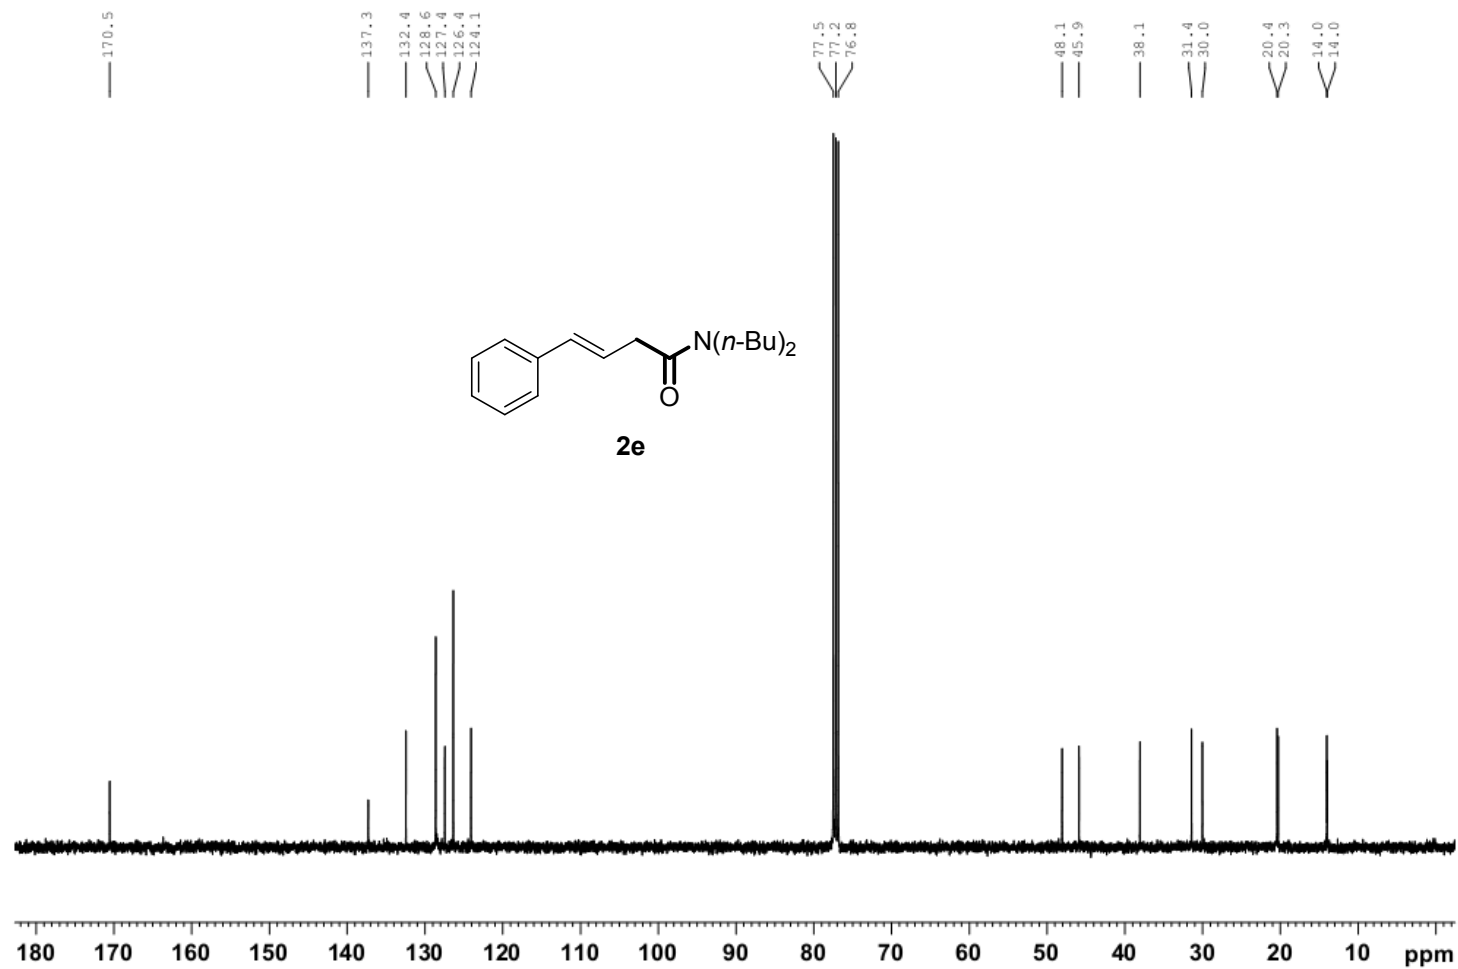

ZGY-130819-4-HNMR

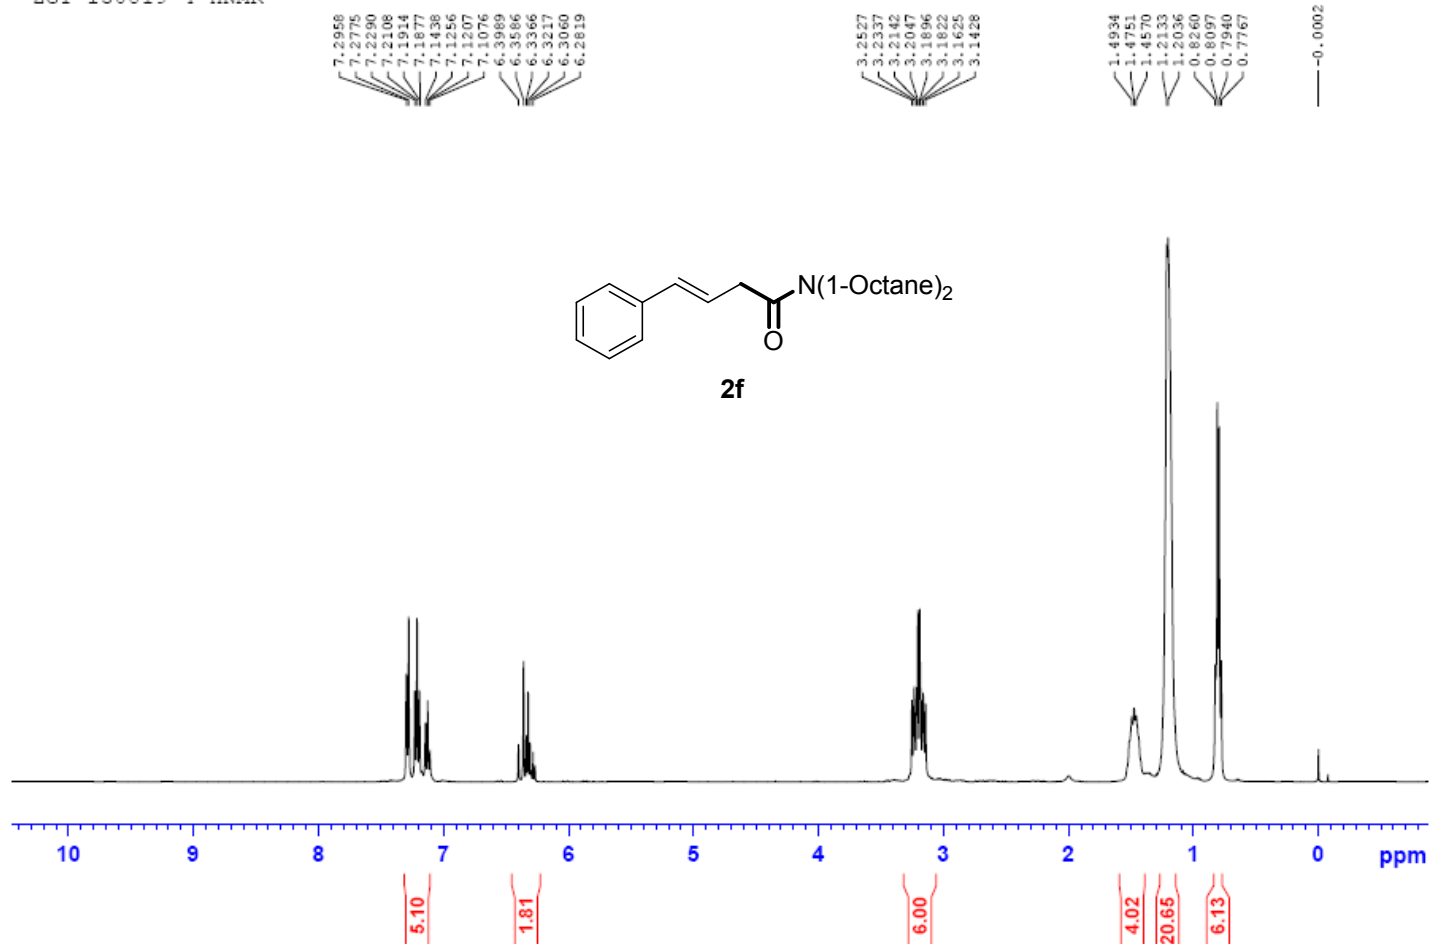

ZGY-130819-4-CNMR

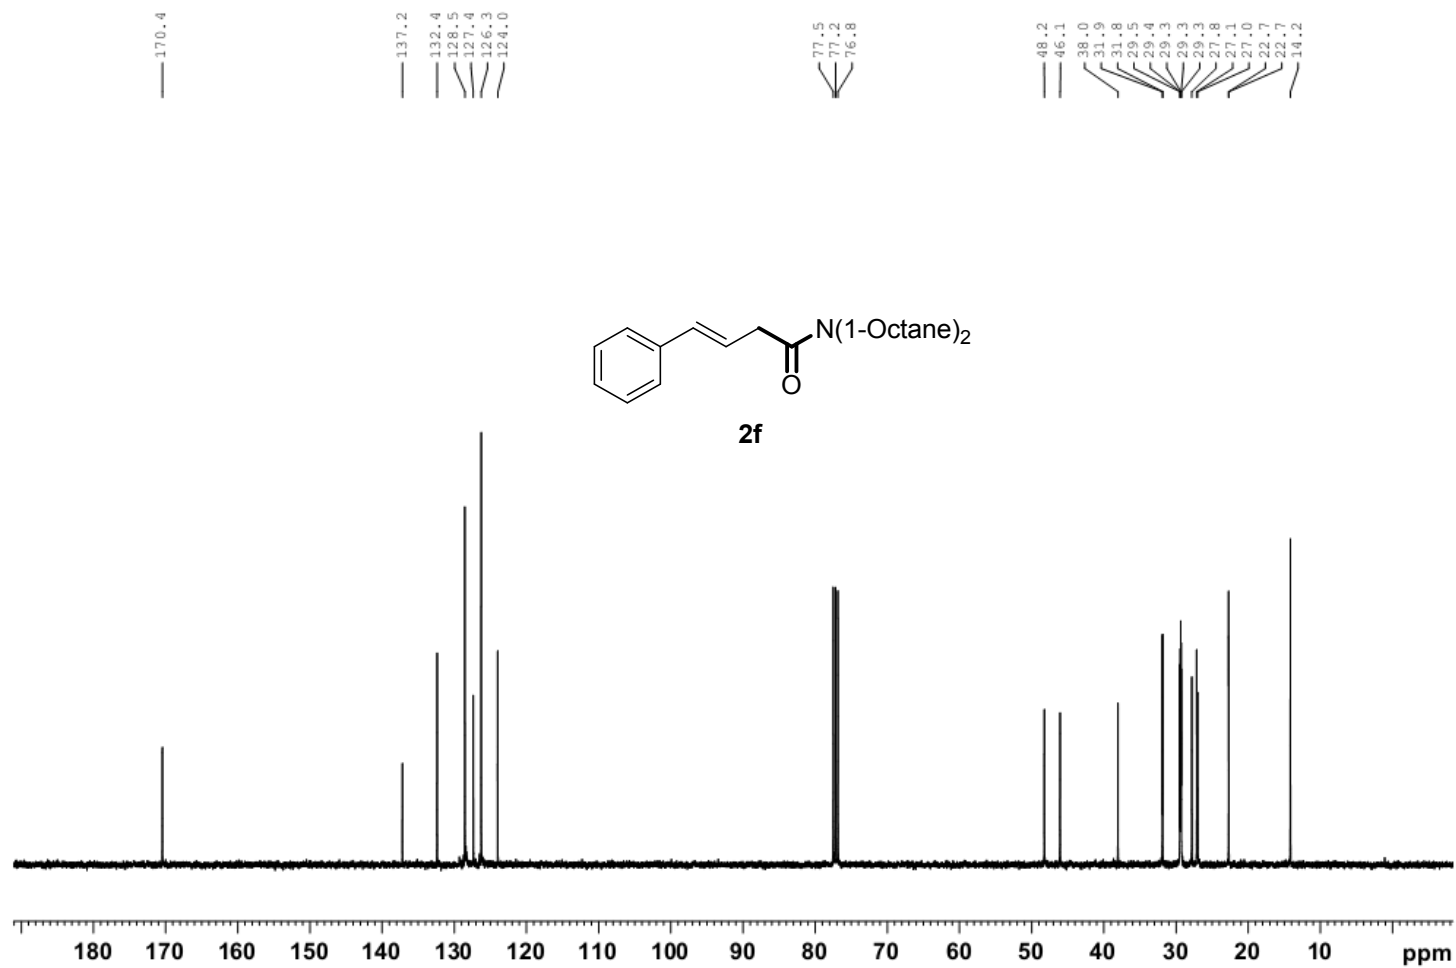

YH-140326-1-HNMR

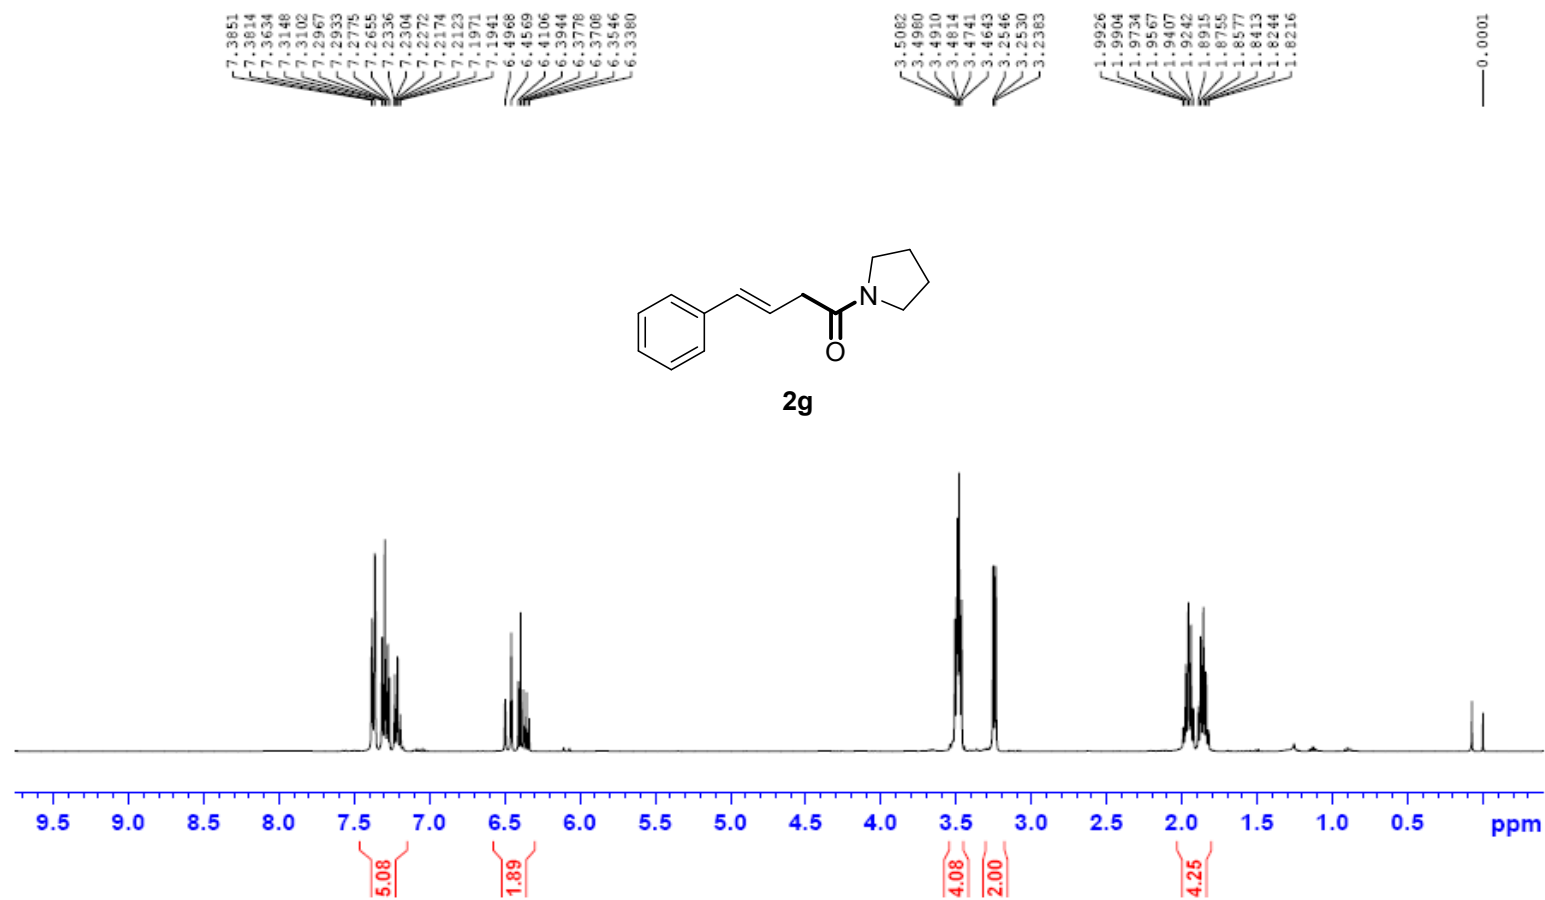



YH-140326-1-CNMR

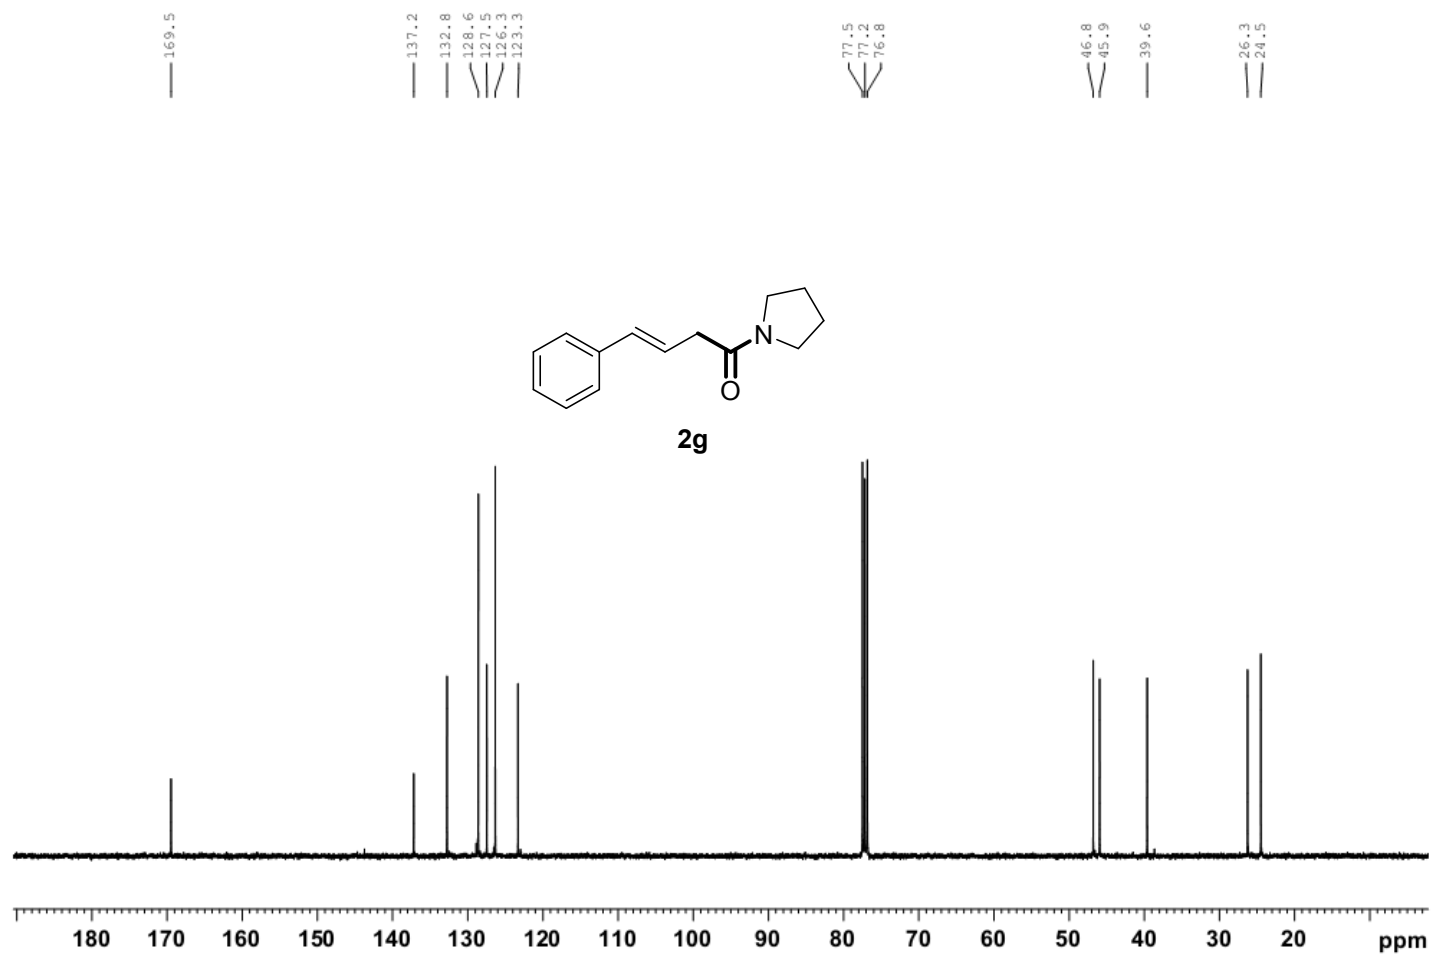

YH-140409-3-HNMR

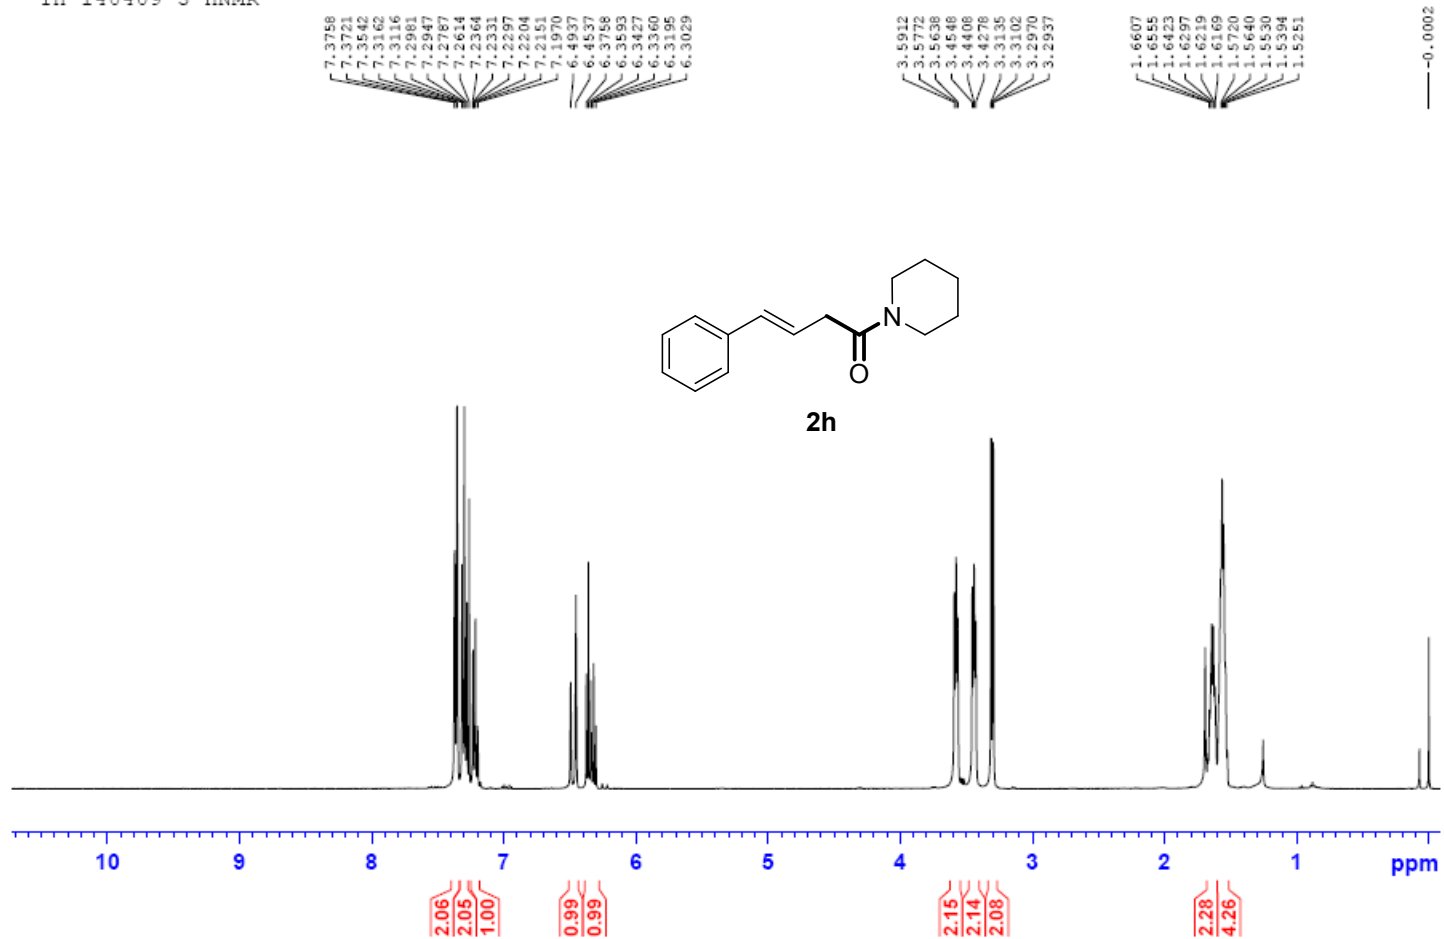

YH-140319-4-CNMR

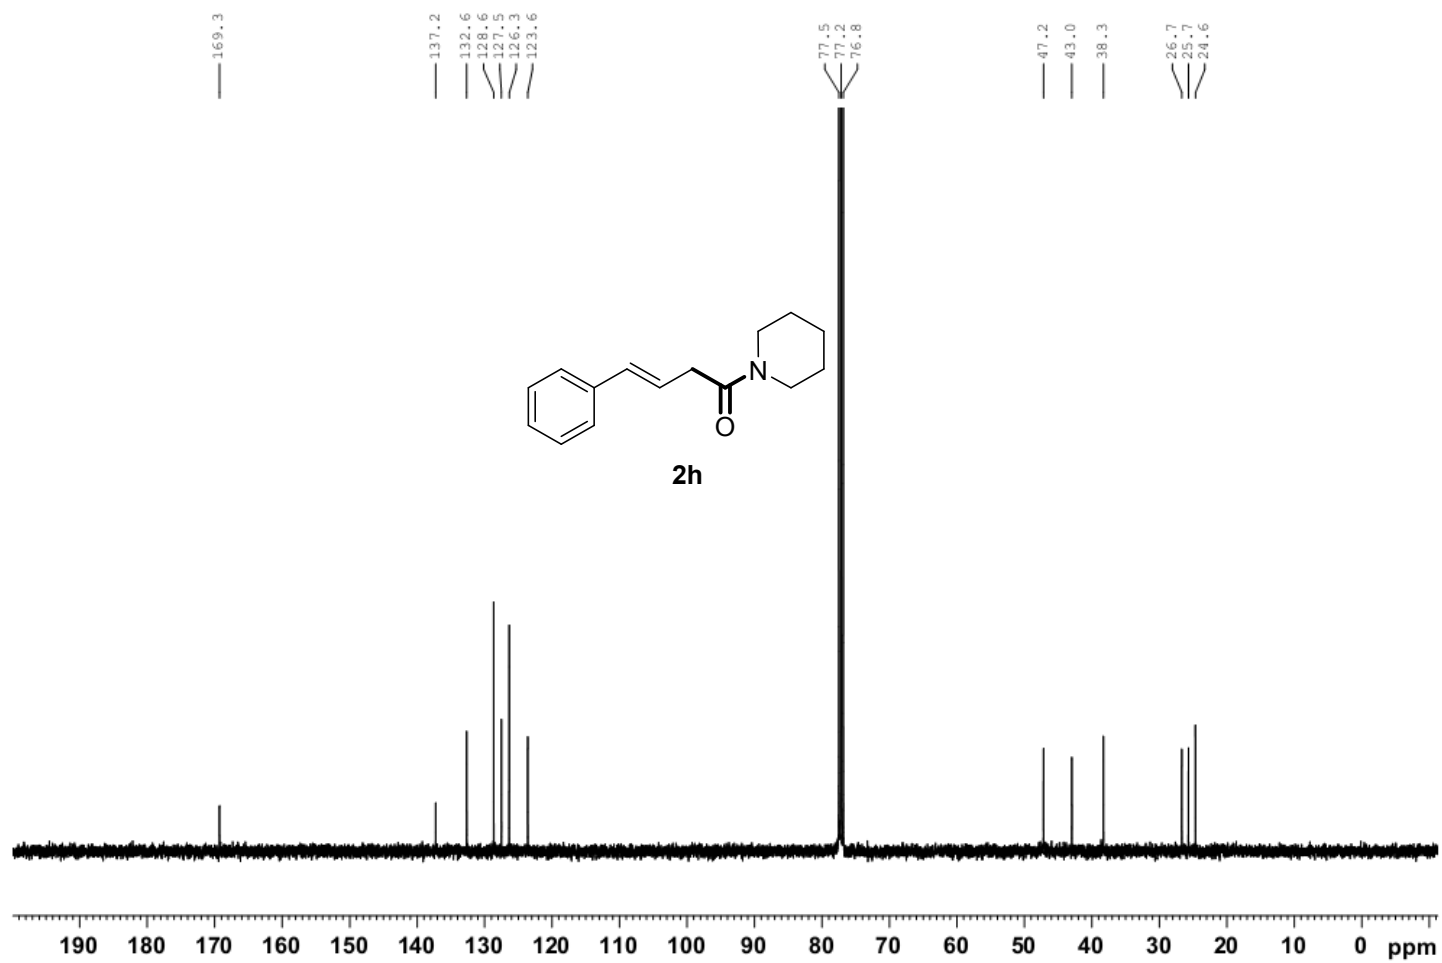

ZGY-130715-1-HNMR

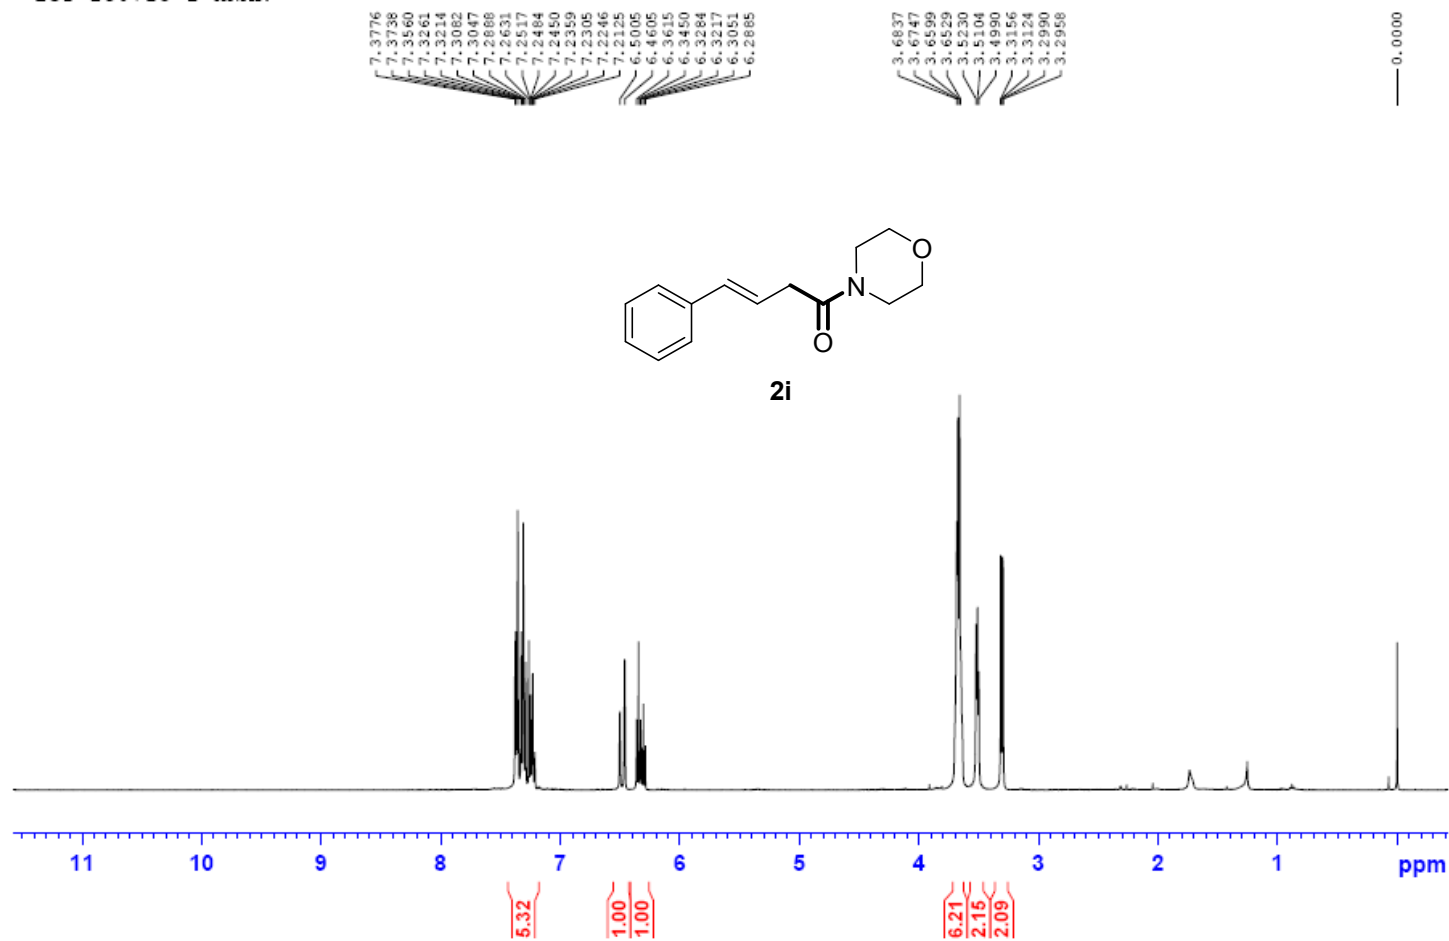

ZGY-130715-1-CNMR

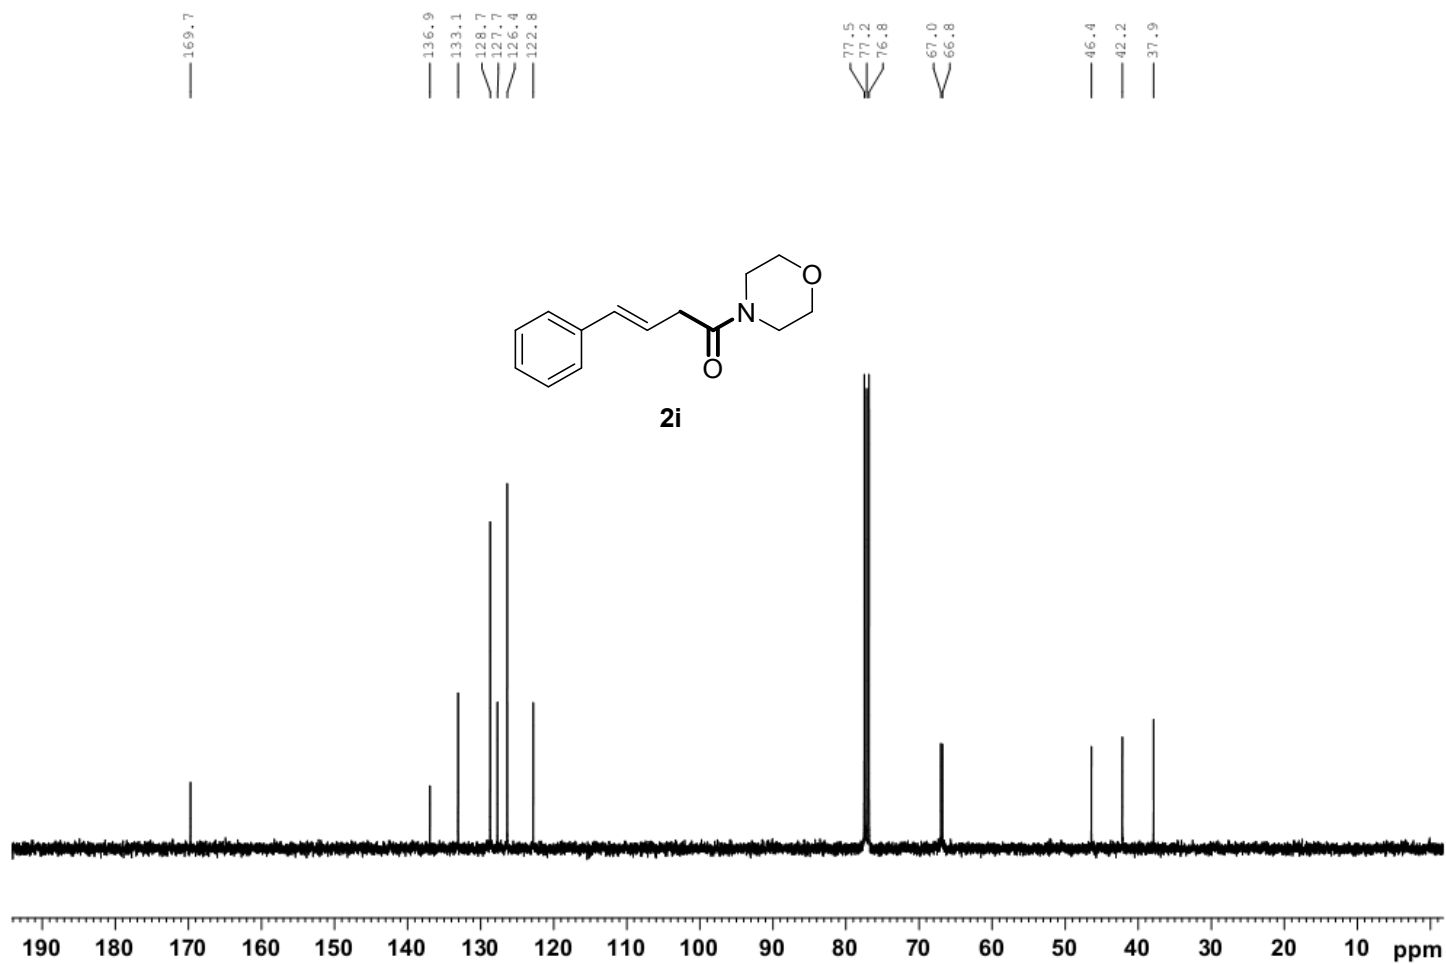

YH-140319-2-HNMR

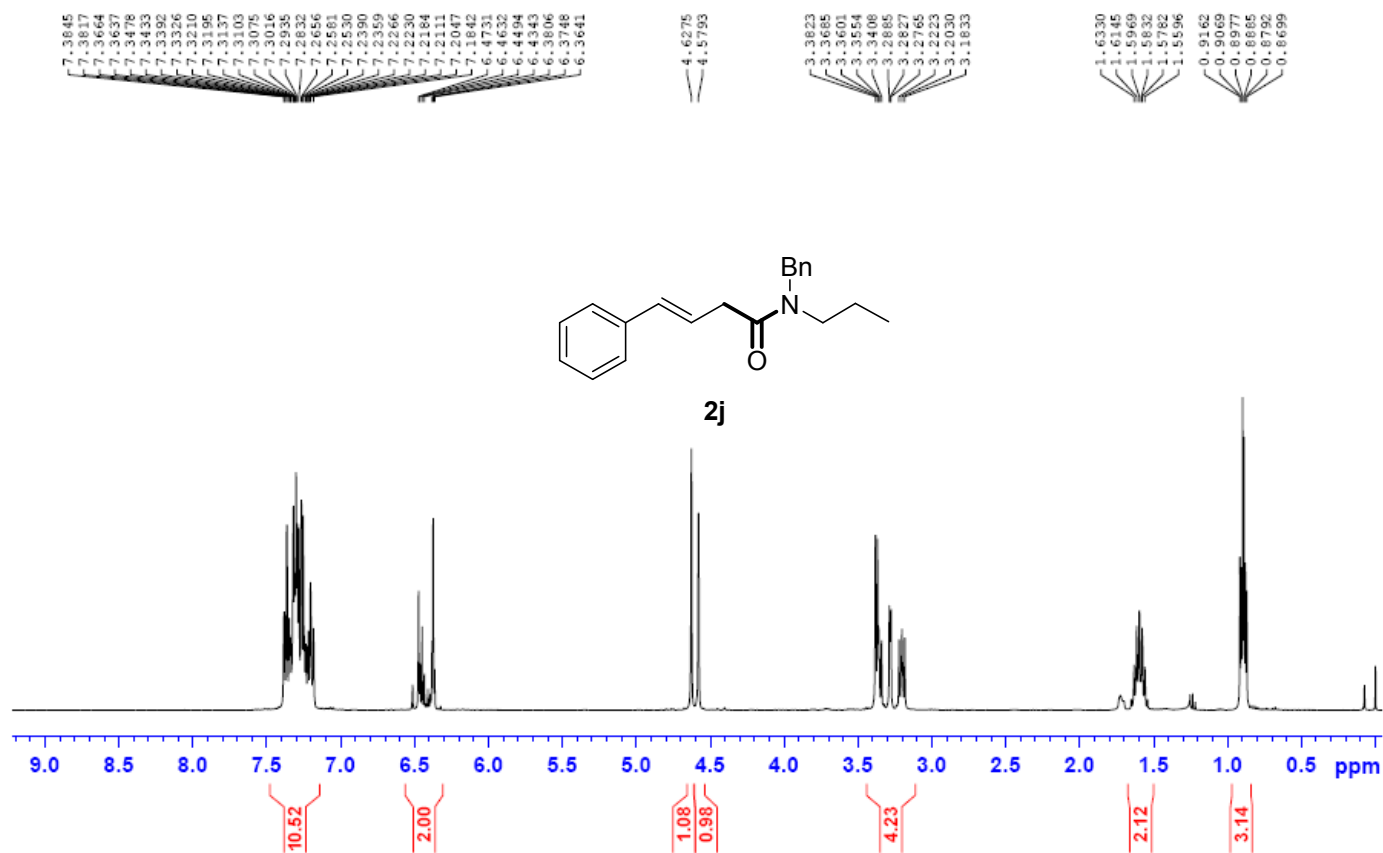

YH-140319-2-CNMR

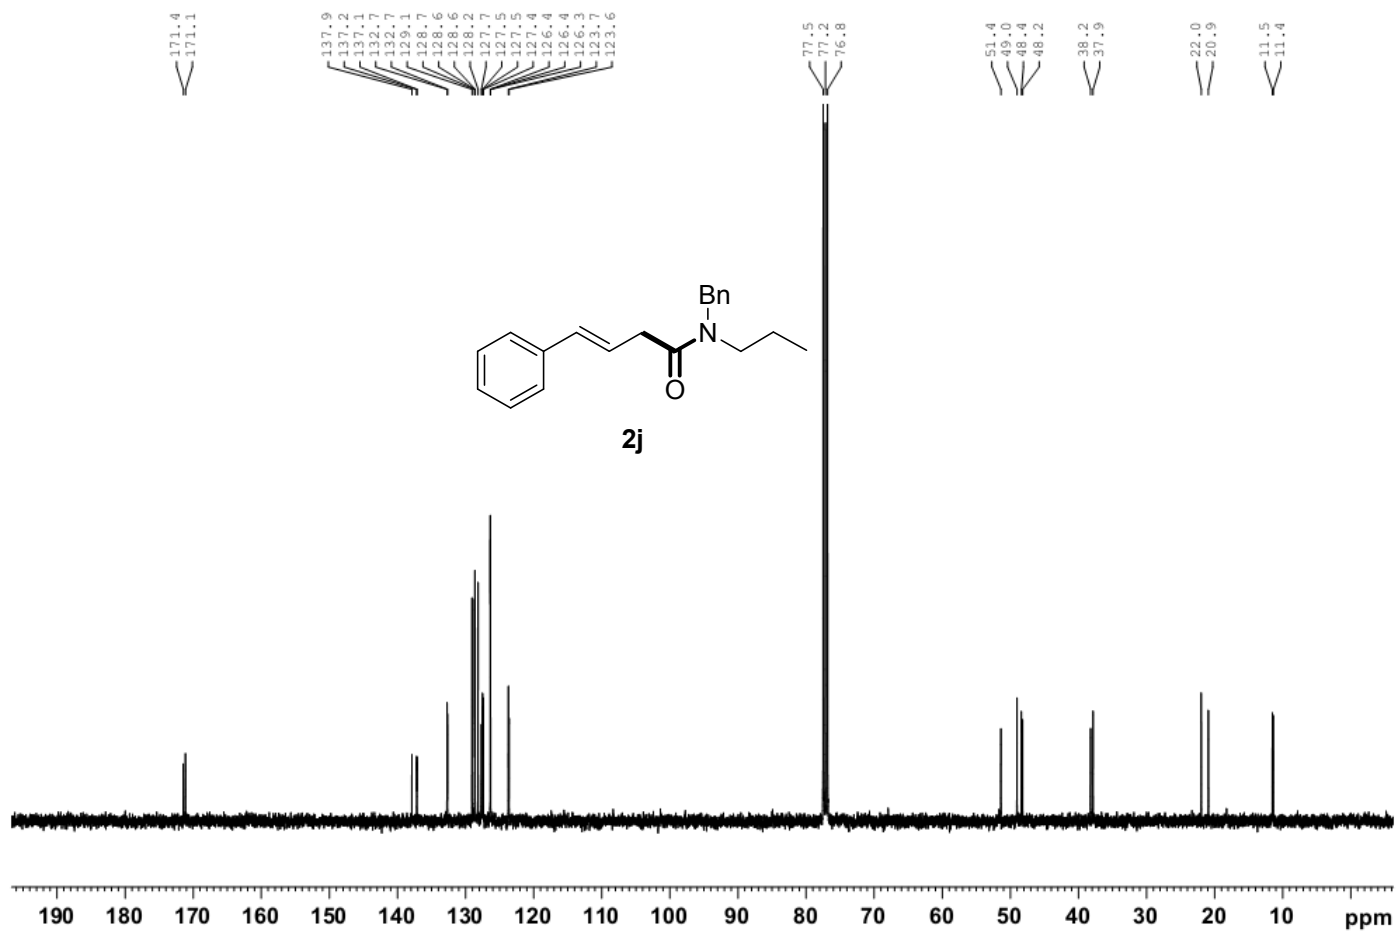

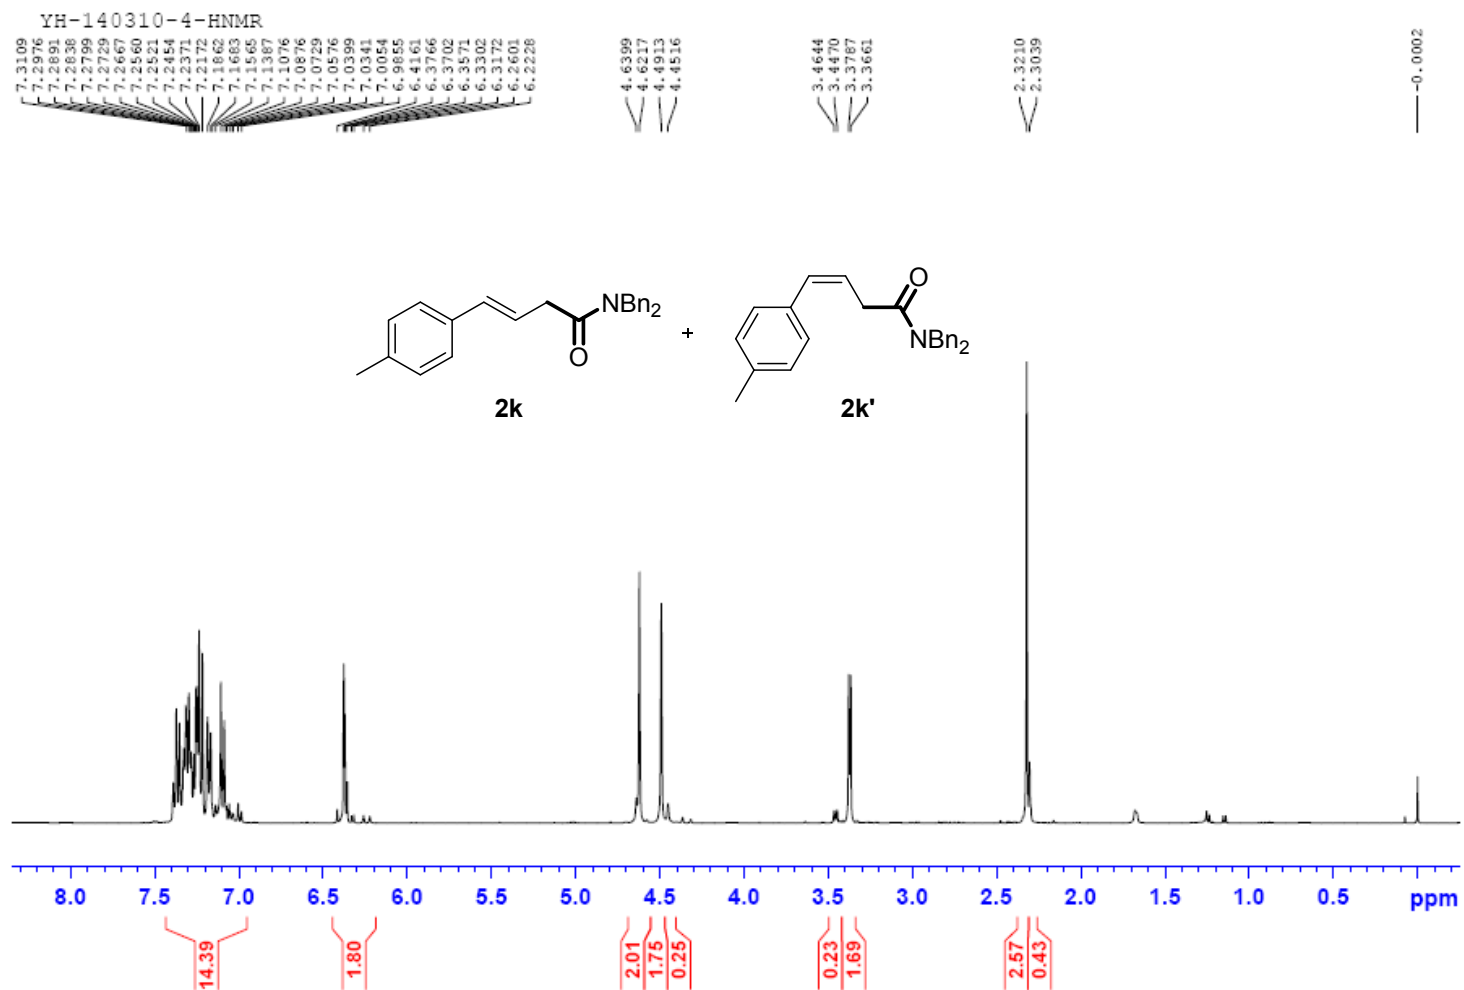



YH-140310-4-CNMR

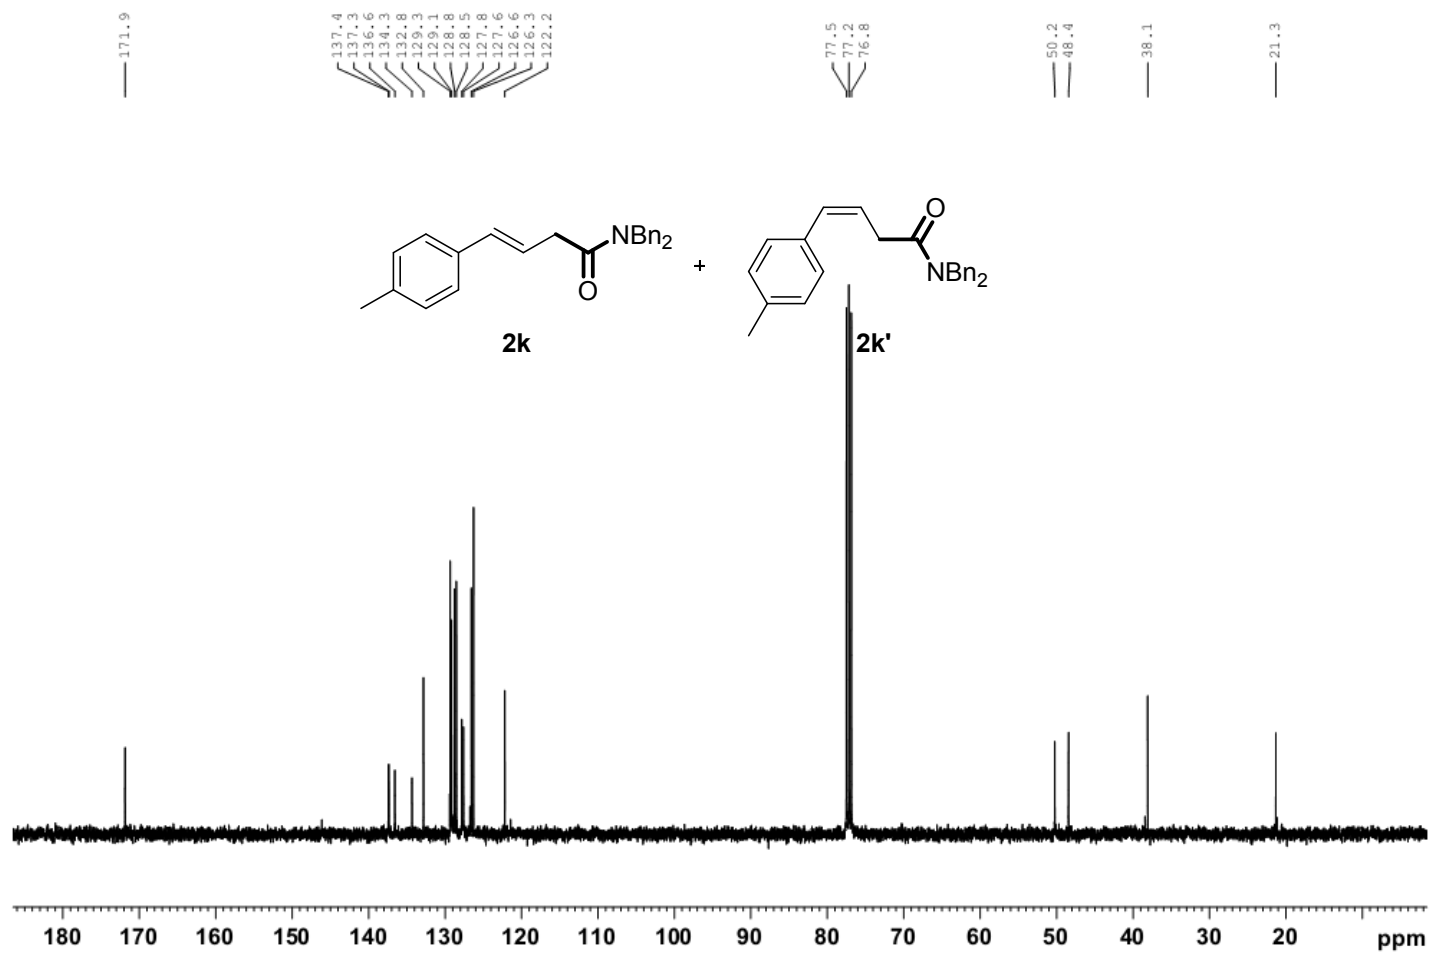

YH-140319-6-HNMR

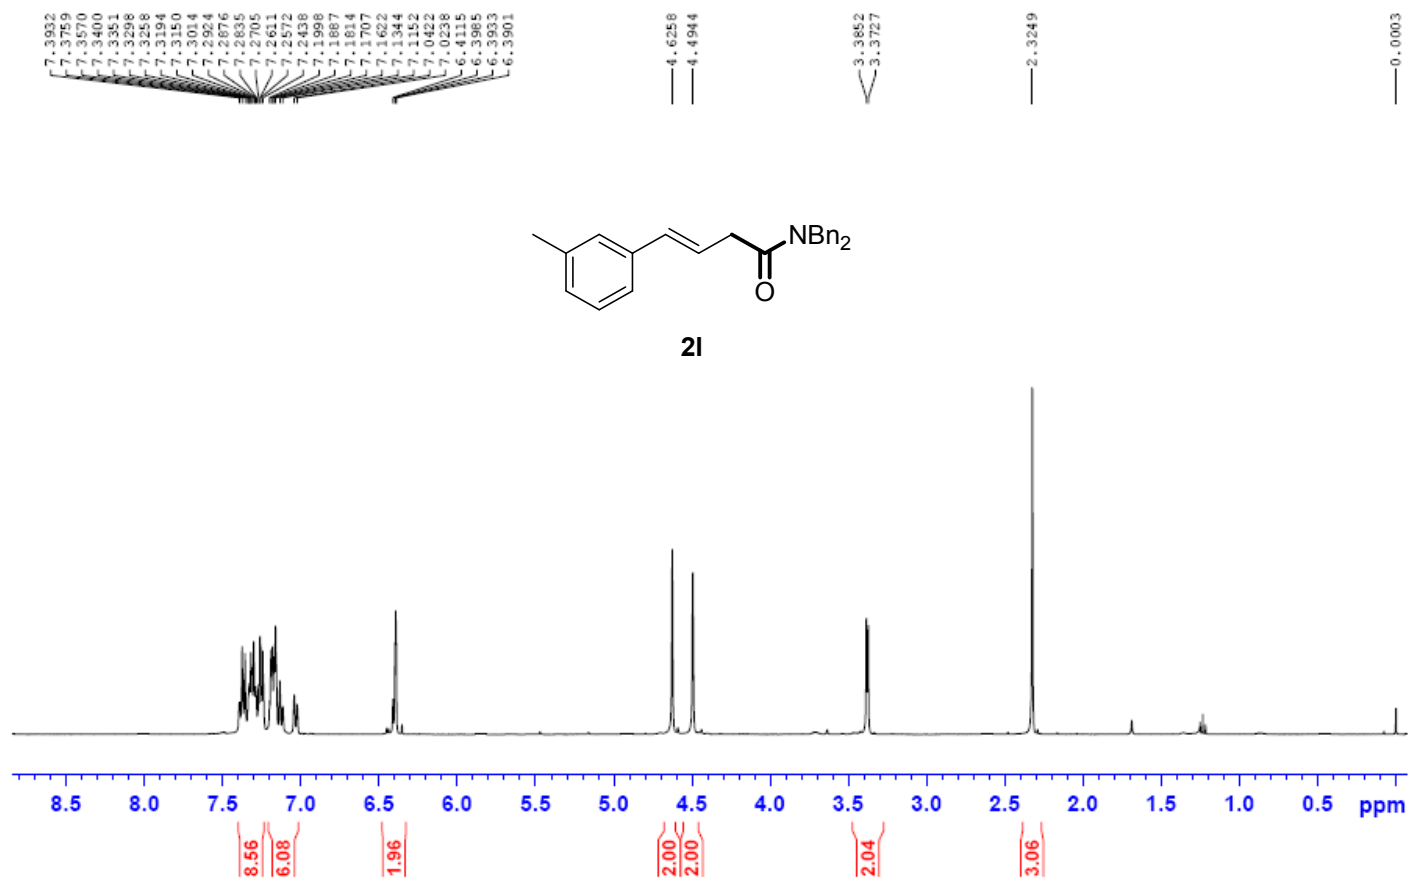

YH-140319-6-CNMR

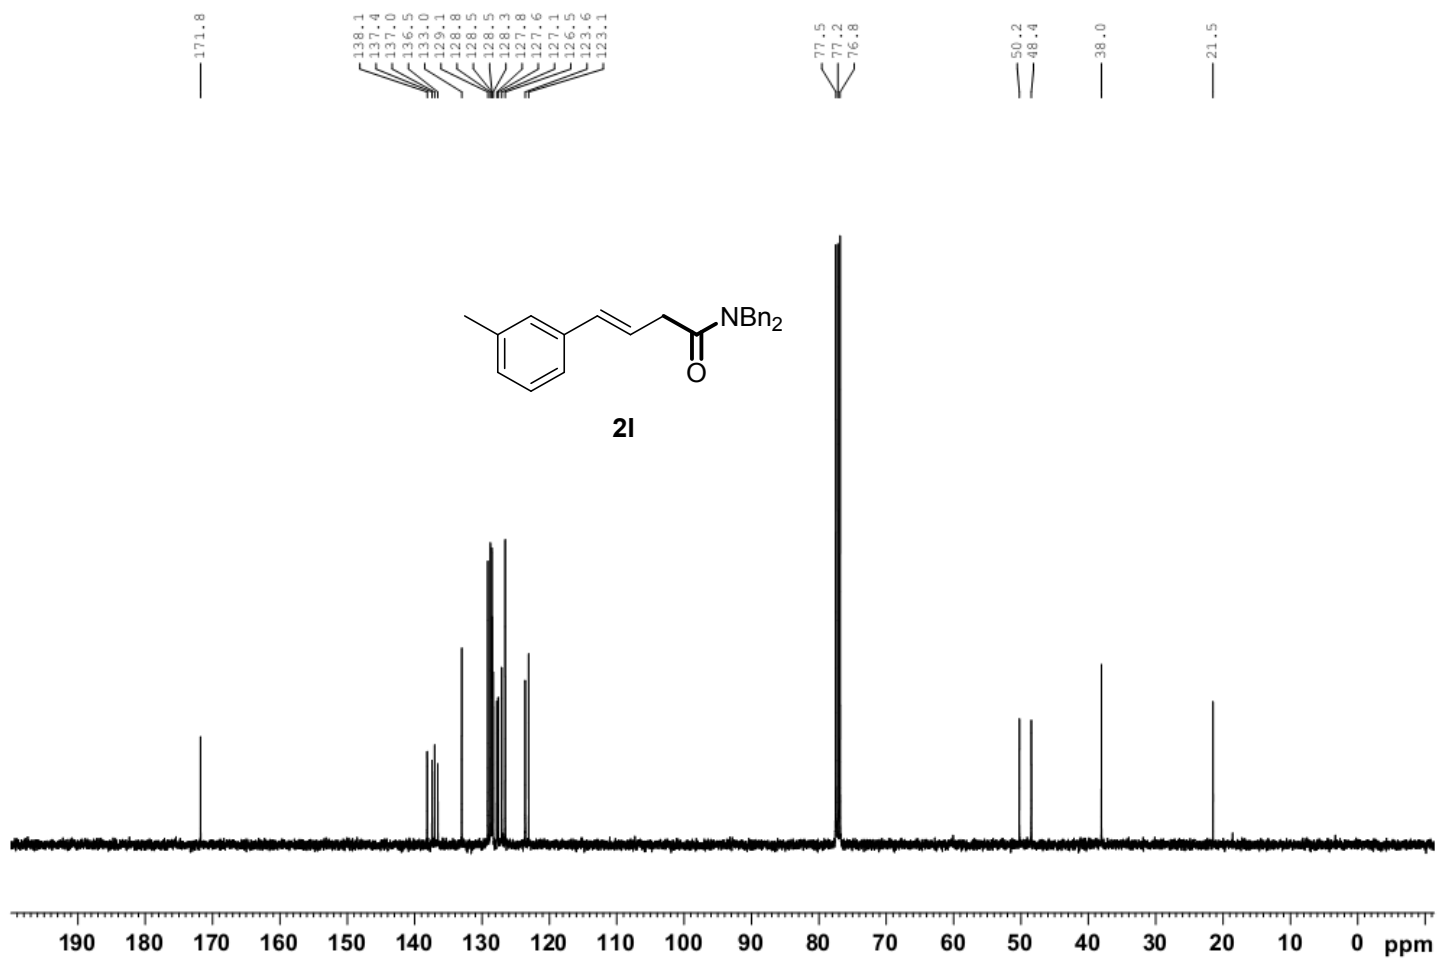

YH-140707-3-HNMR

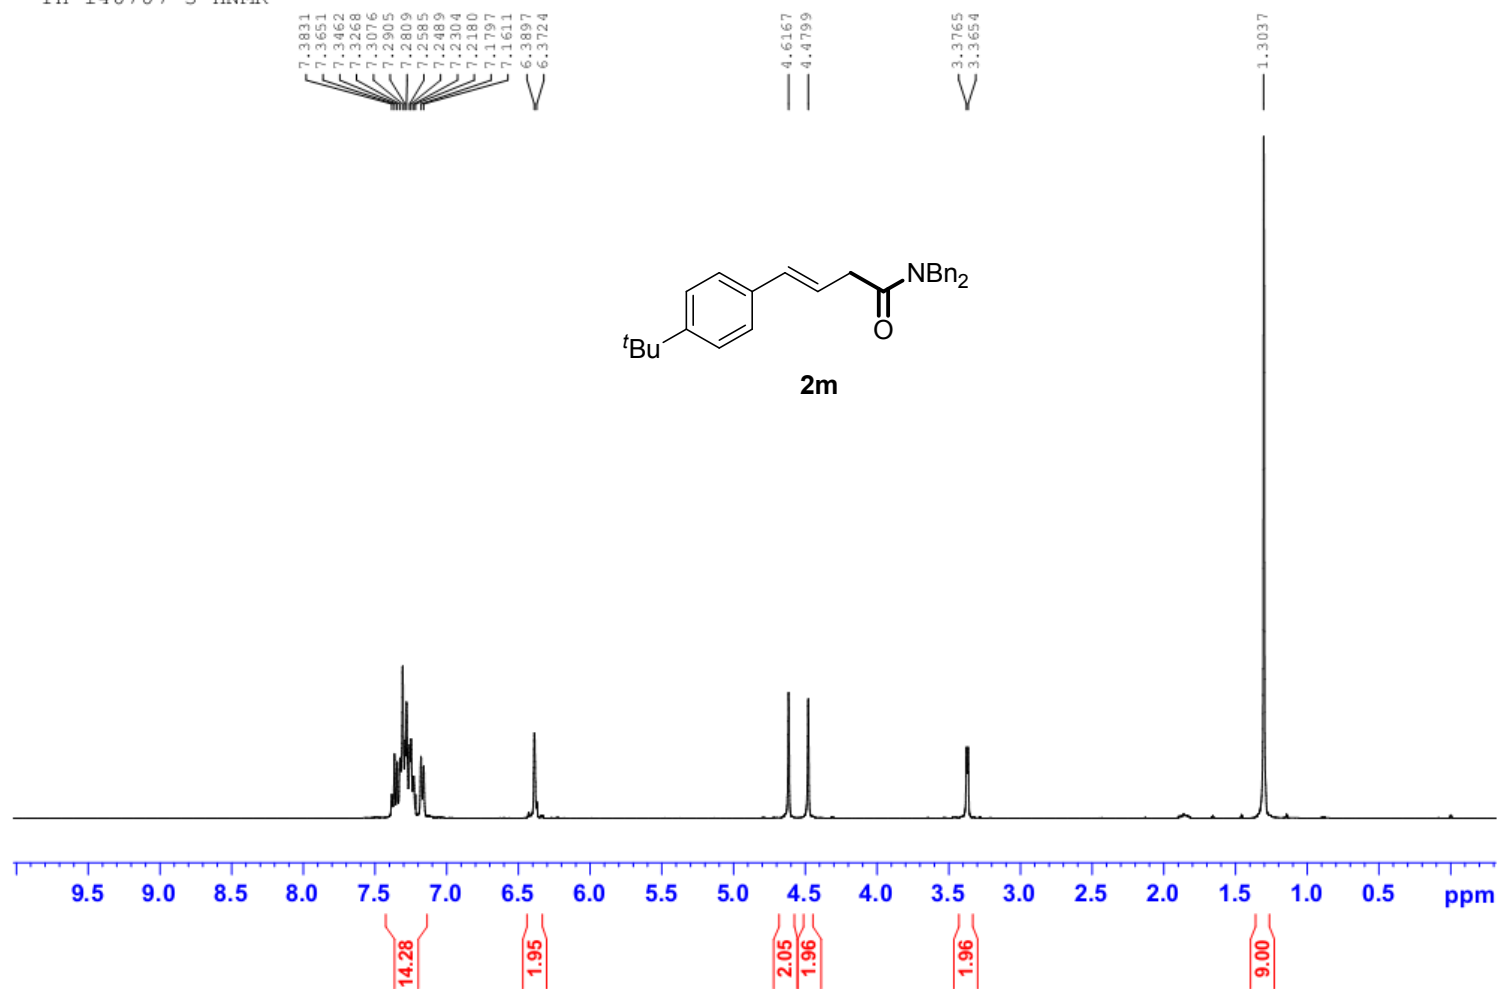

YH-140707-4-CNMR

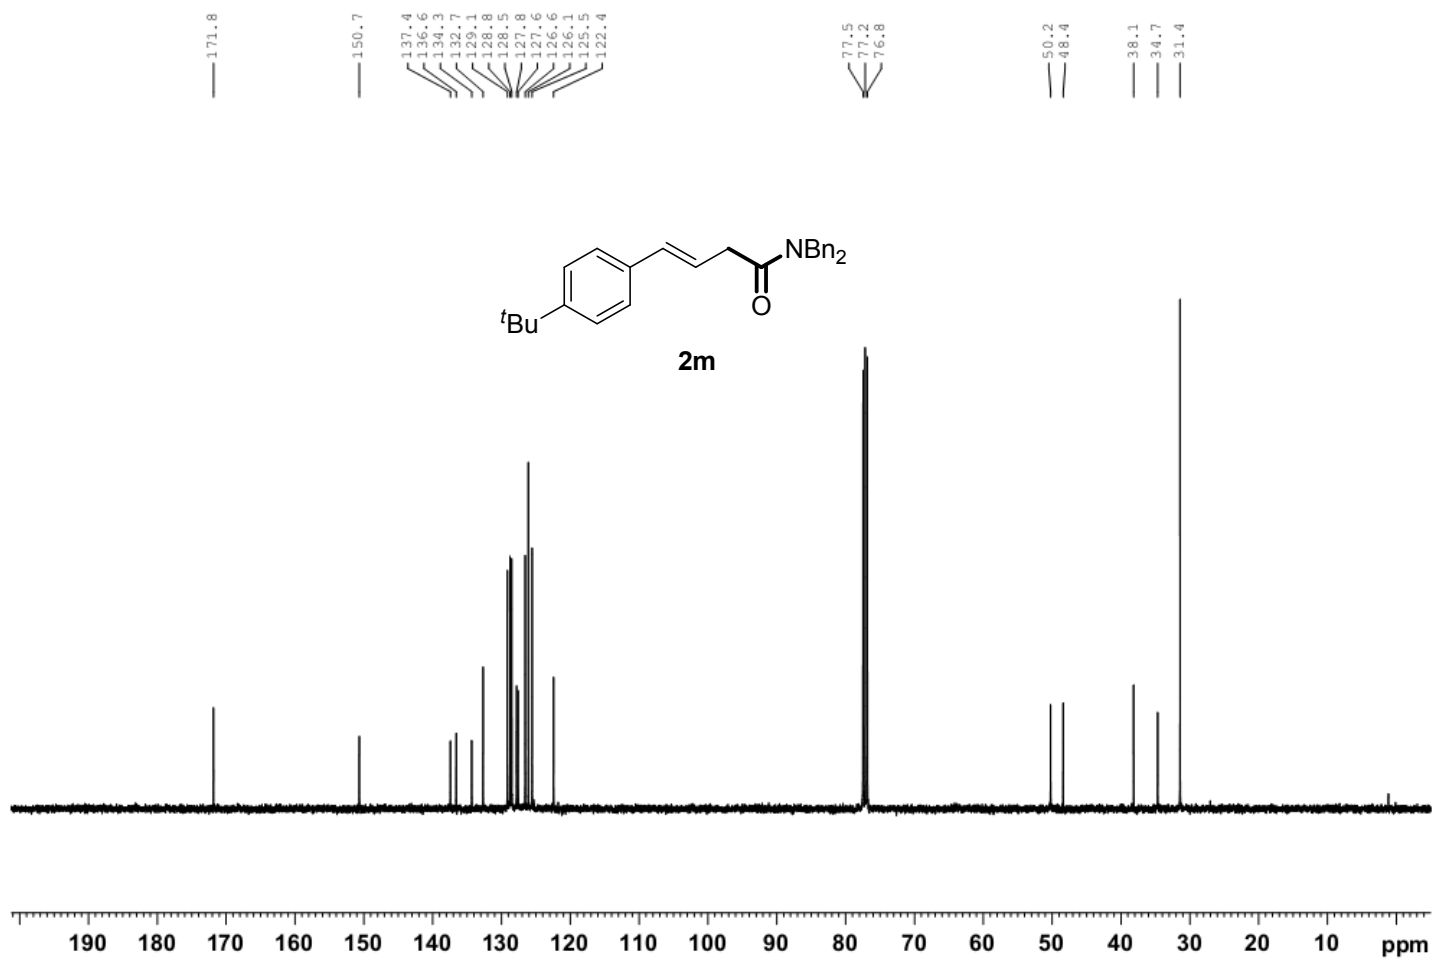

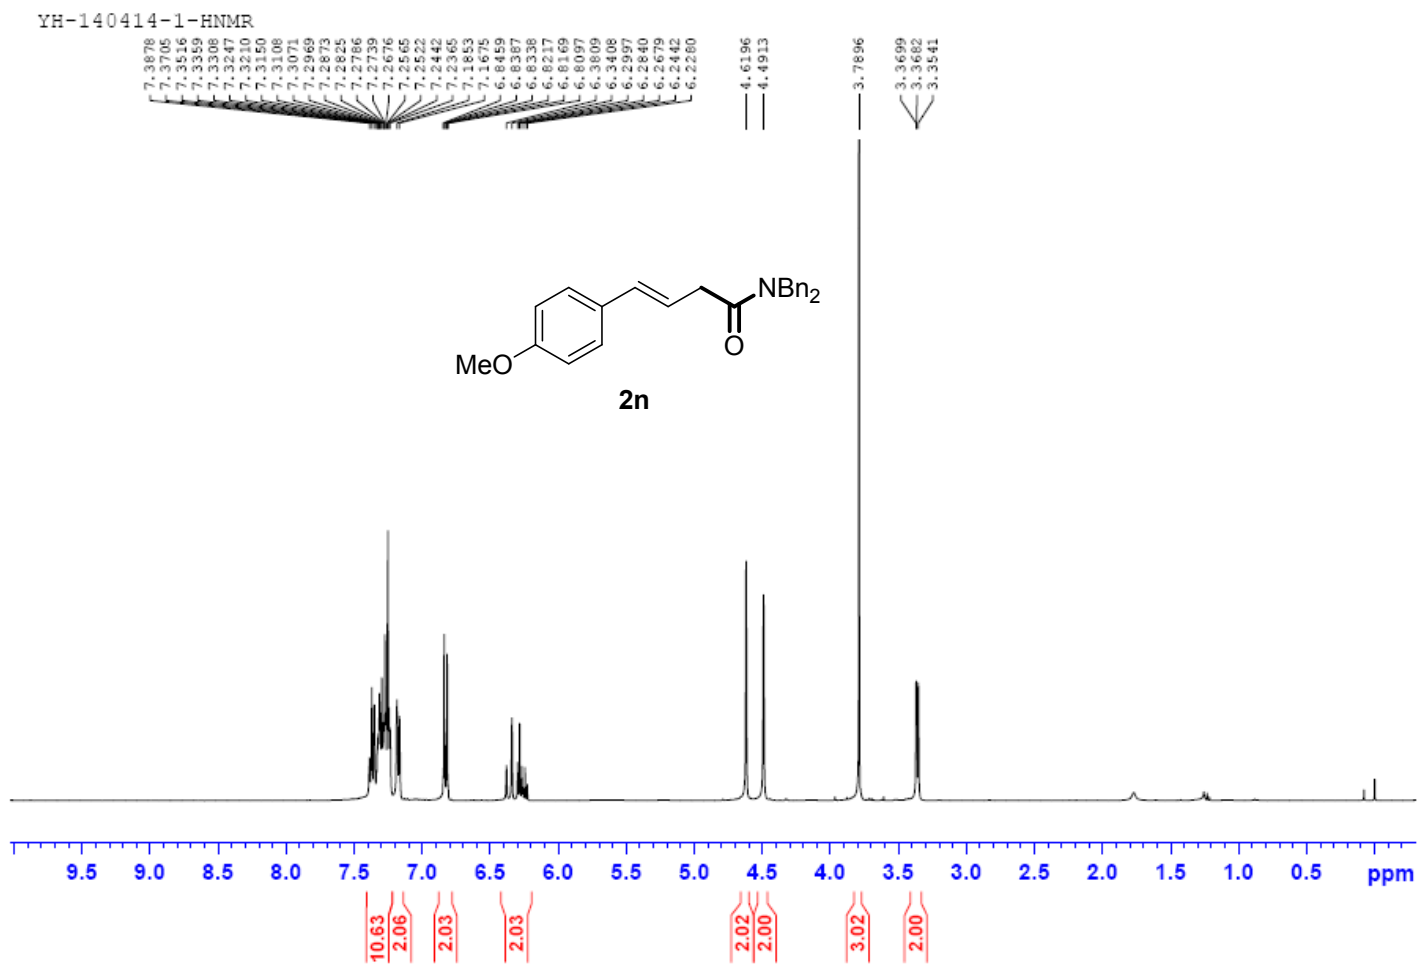

YH-140414-1-CNMR

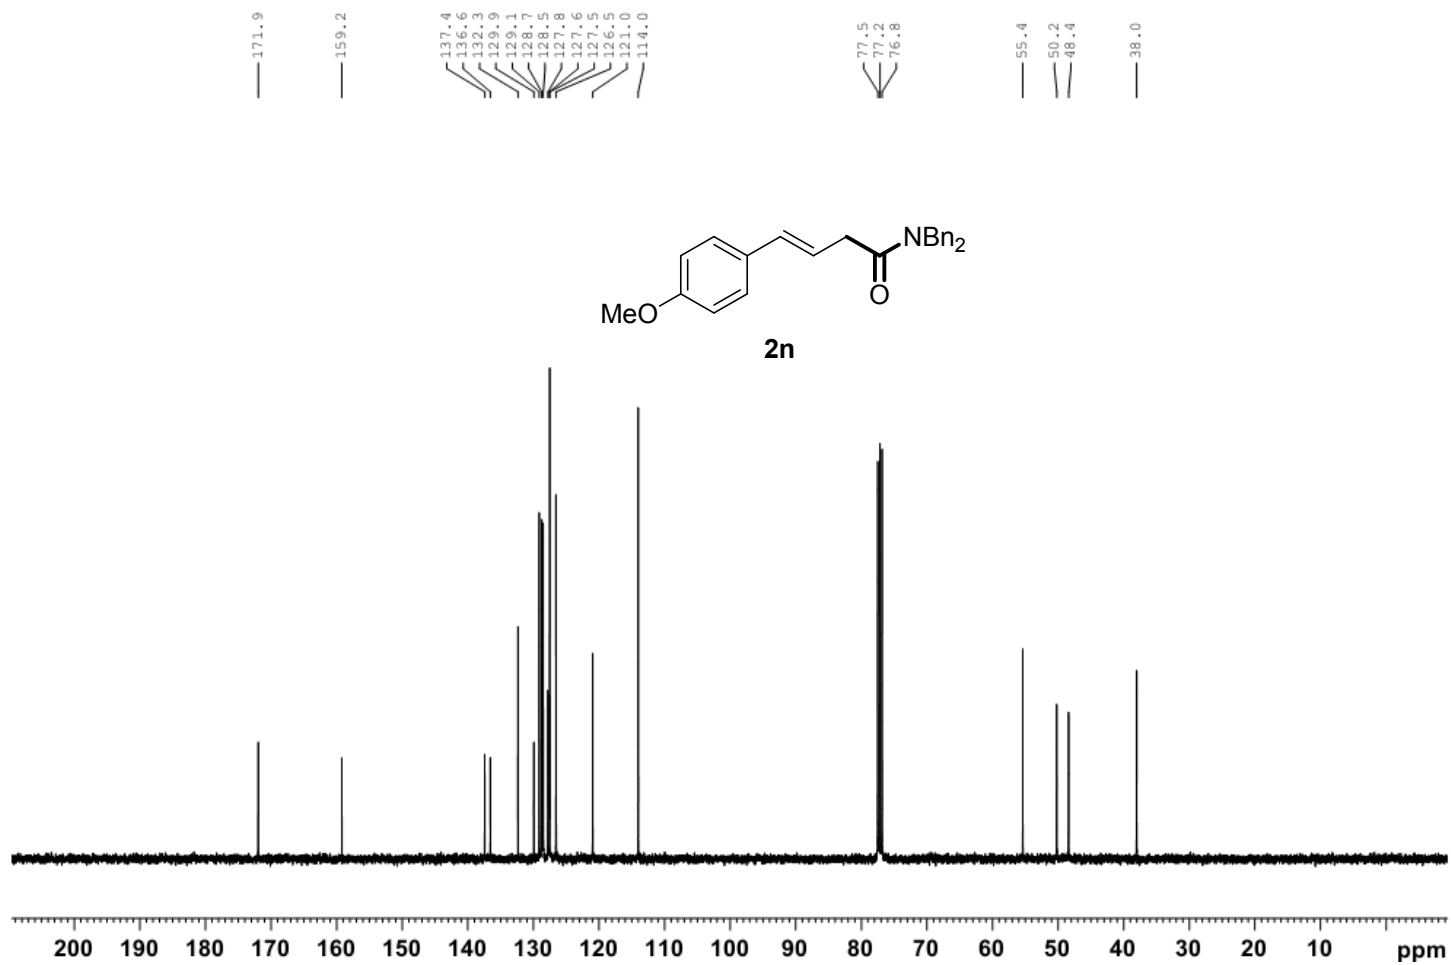

YH-140409-5-HNMR

7.3636  
7.3665  
7.3476  
7.3317  
7.3200  
7.3165  
7.3114  
7.3077  
7.3027  
7.2933  
7.2790  
7.2763  
7.2588  
7.2537  
7.2371  
7.1824  
7.1644  
6.8254  
6.8037  
6.3762  
6.3351  
6.2911  
6.2763  
6.2592  
6.2514  
6.2355  
6.2194

4.6169  
4.4681

4.0378  
4.0203  
4.0029  
3.9855

3.3649  
3.3490

1.4144  
1.3969  
1.3794

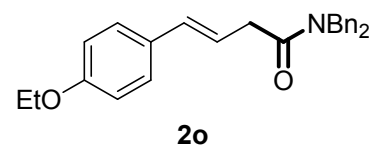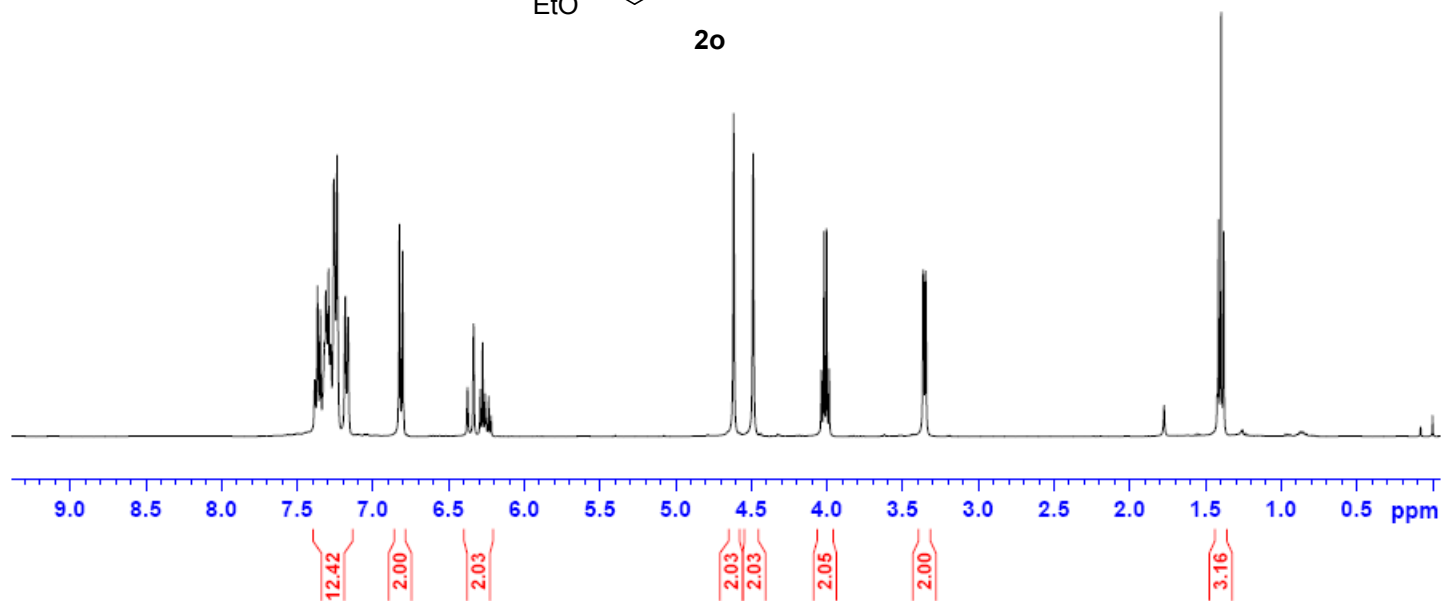



YH-140409-5-CNMR

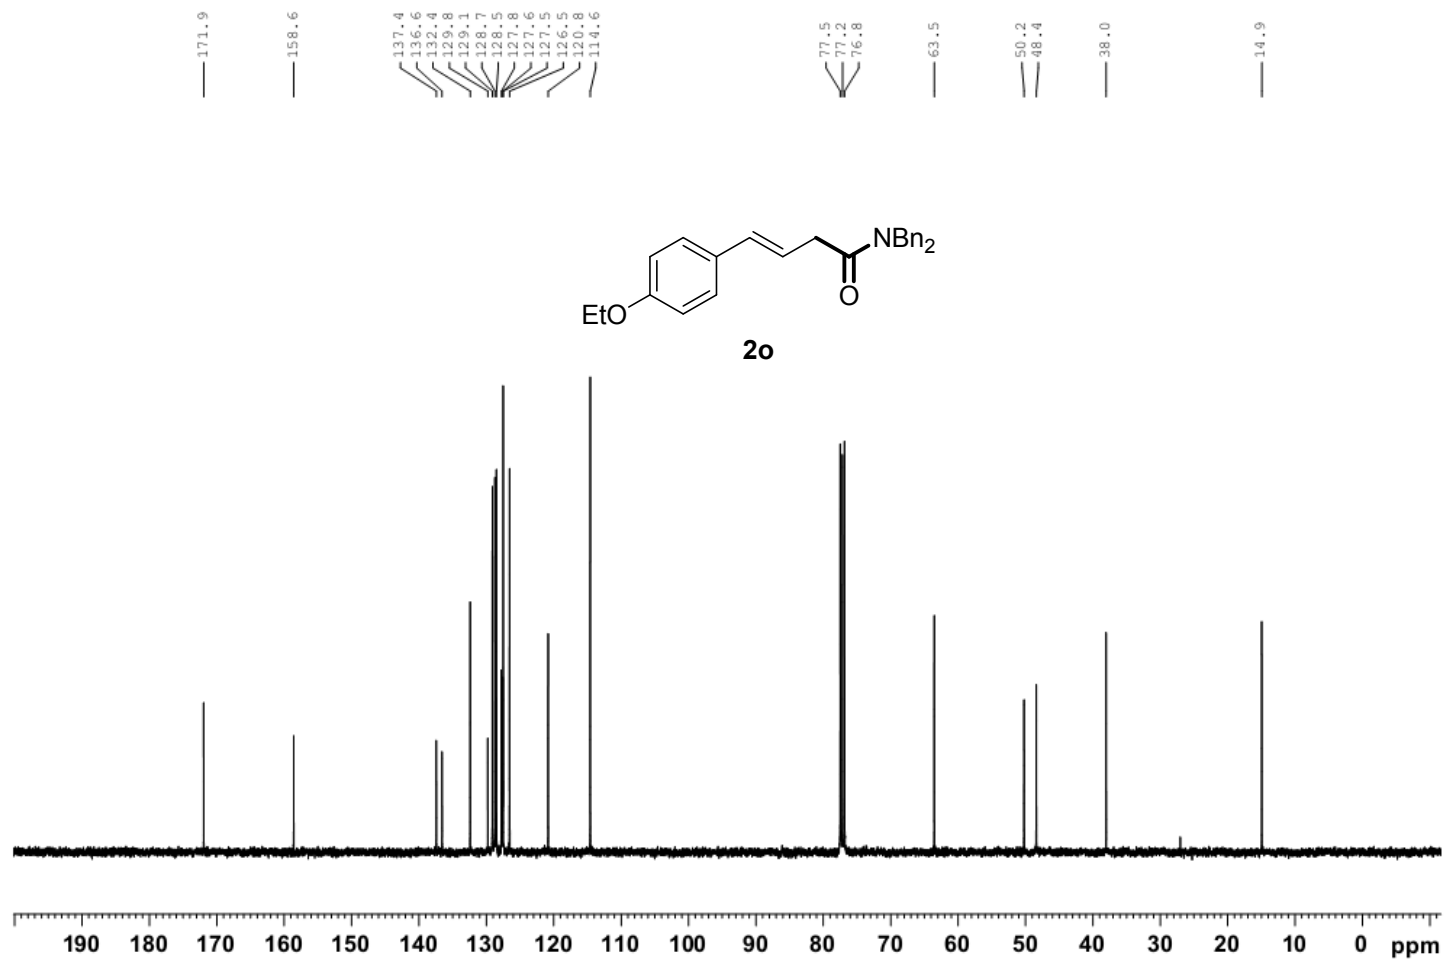

YH-140414-5-HNMR

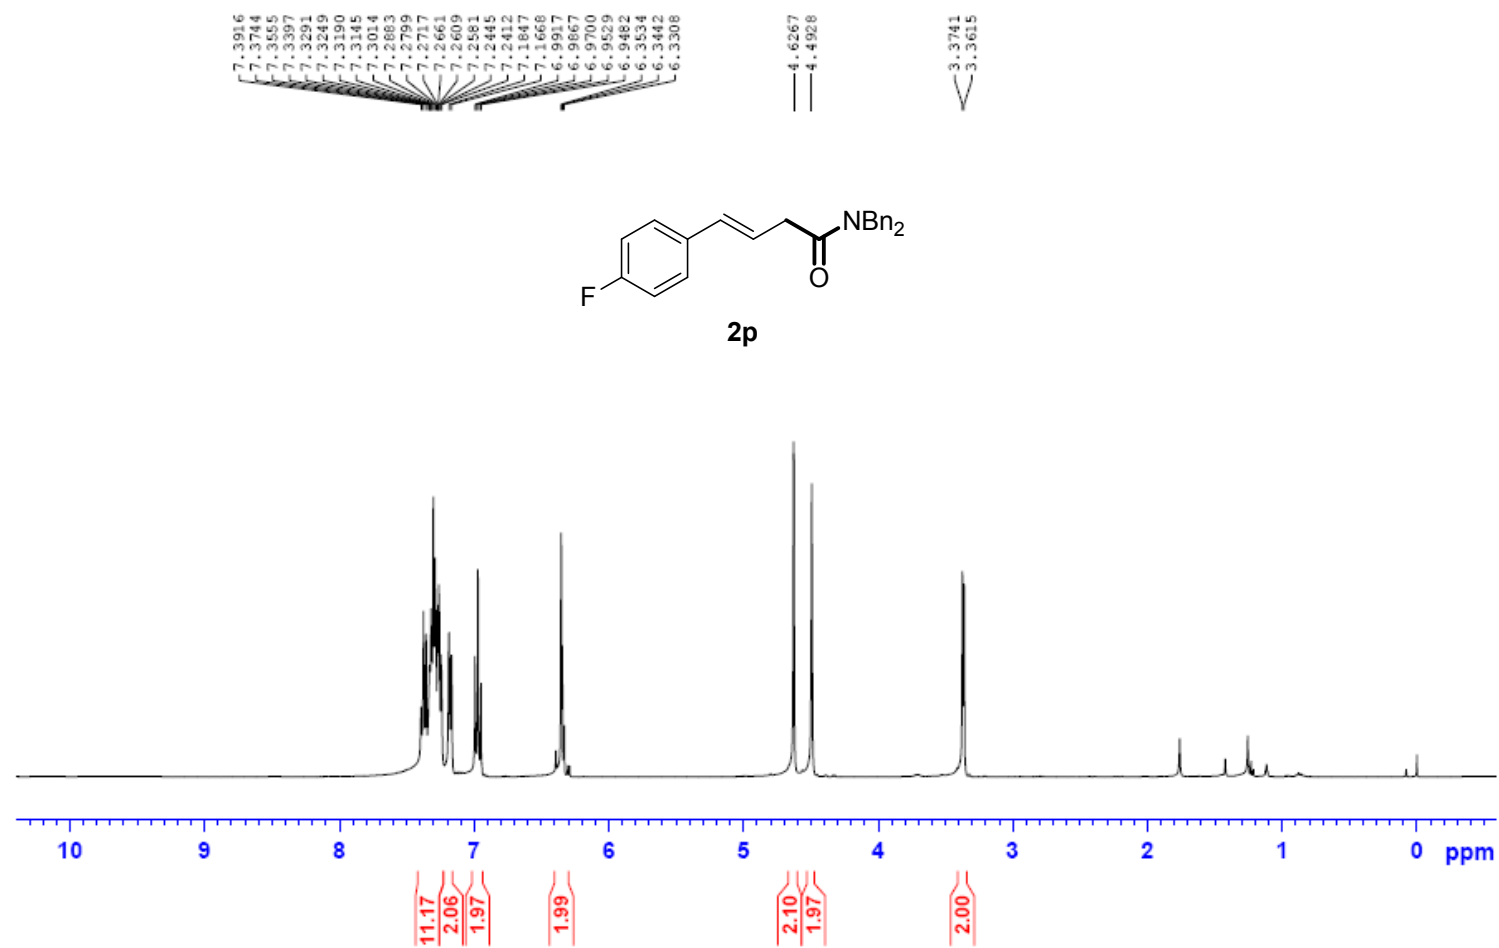

YH-140416-3-CNMR

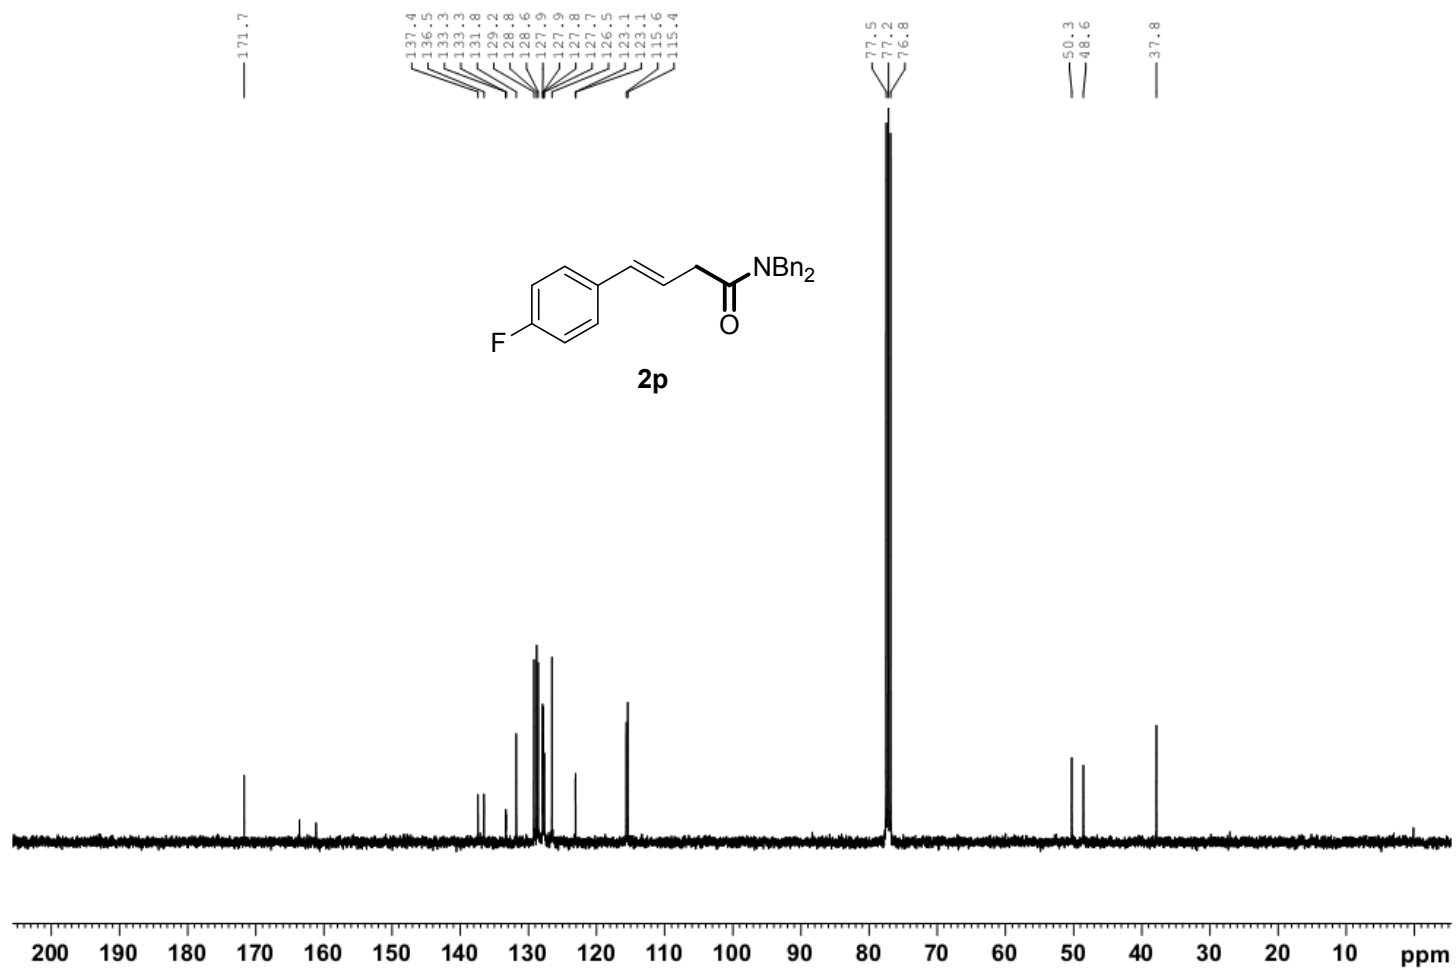

YH-141003-4-FNMR

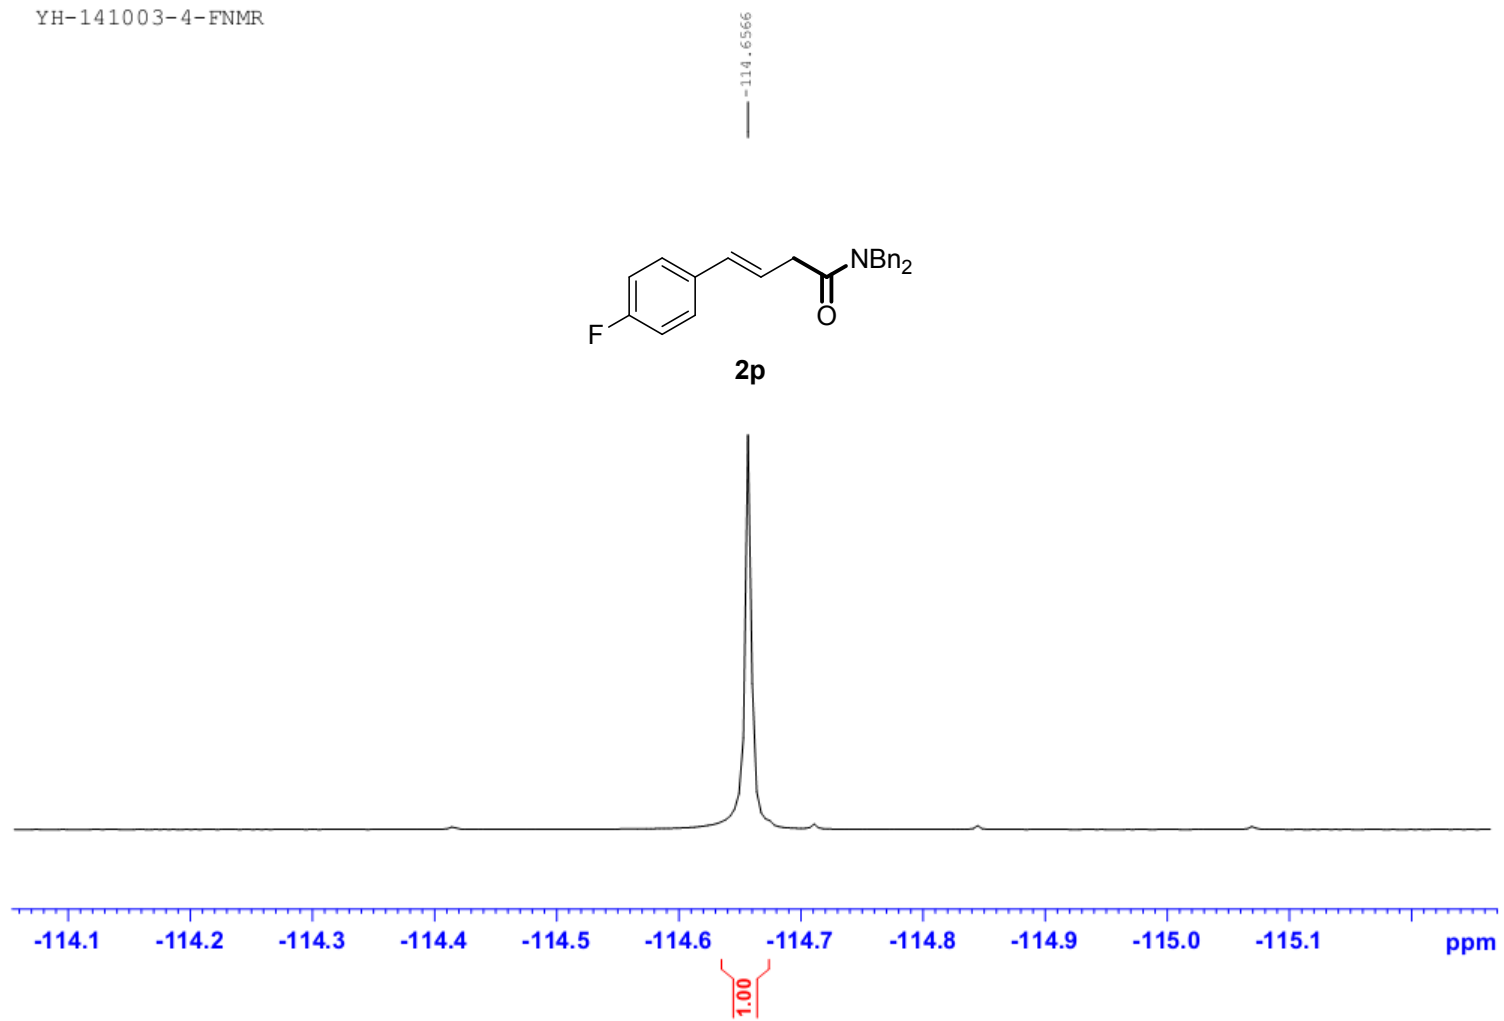

YH-140310-2-HNMR

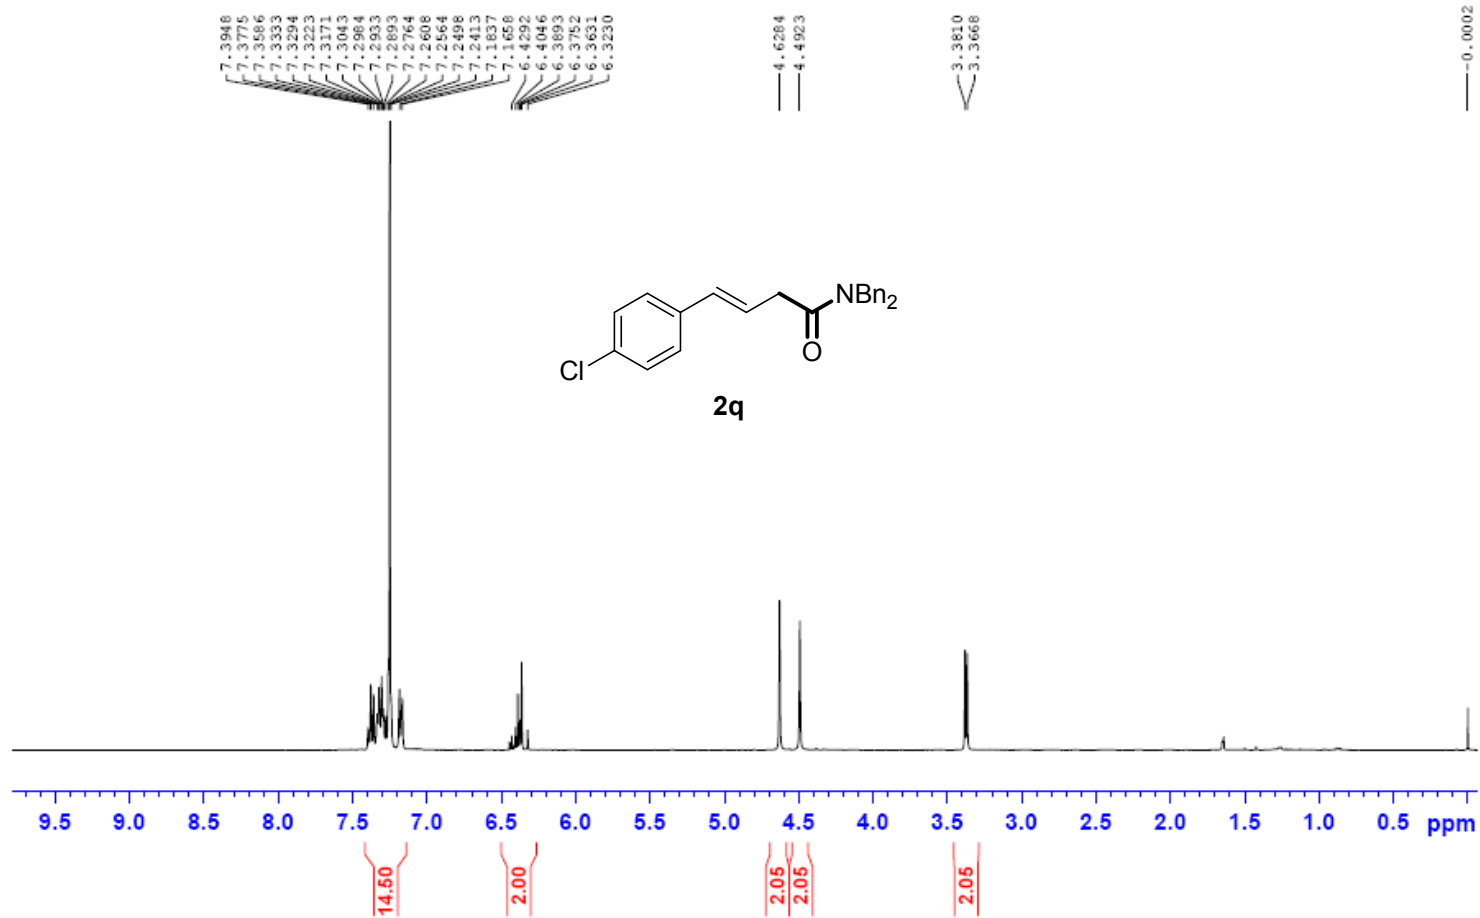

YH-140310-2-CNMR

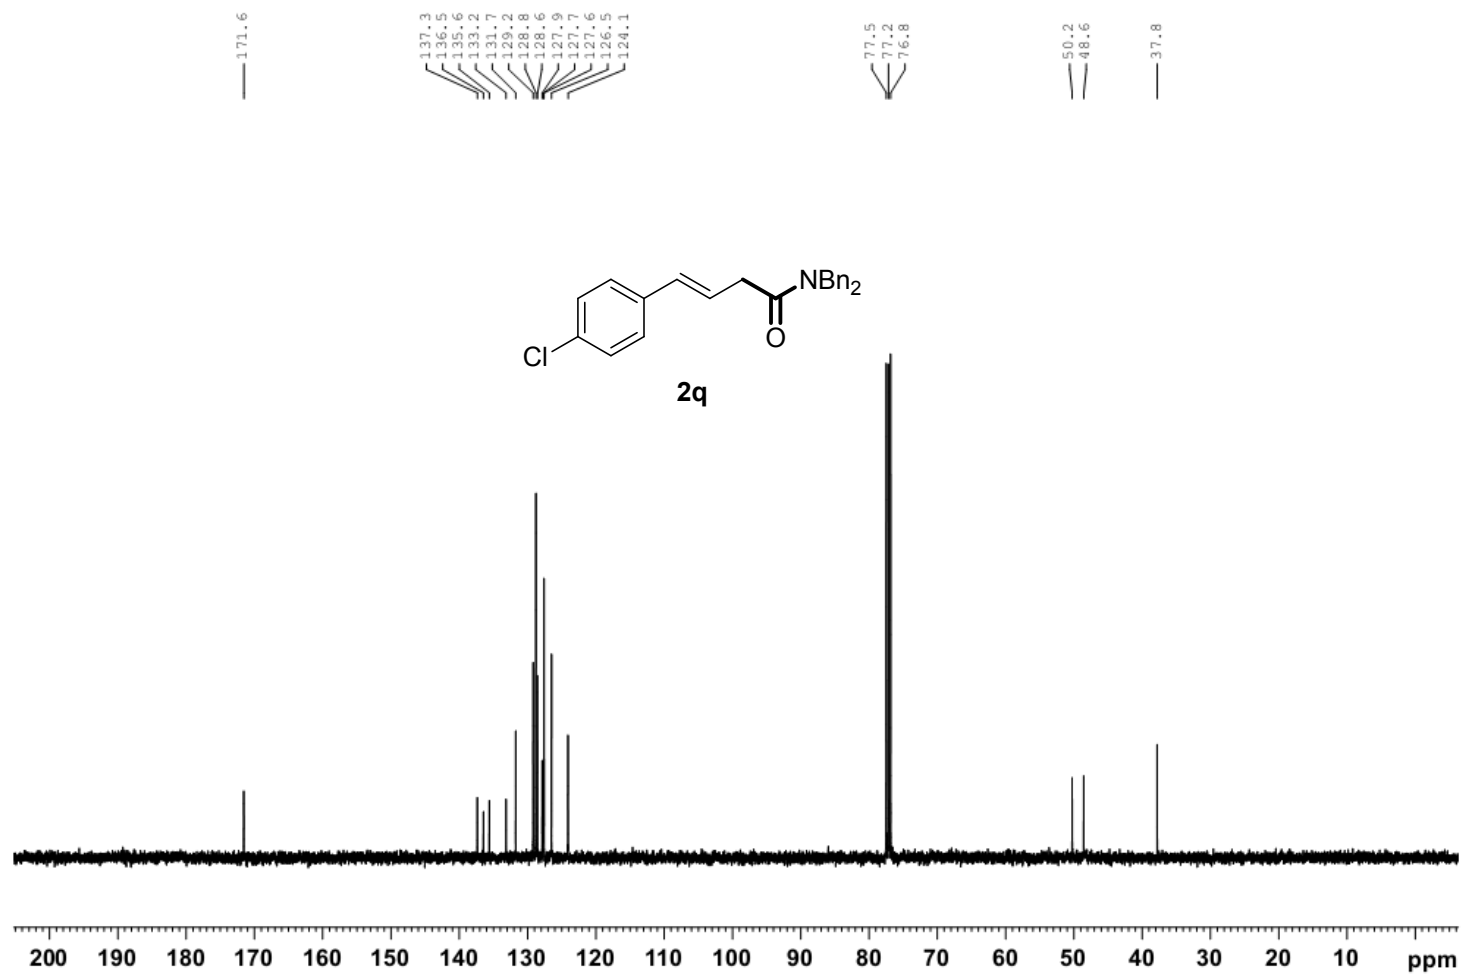

YH-140409-7-HNMR

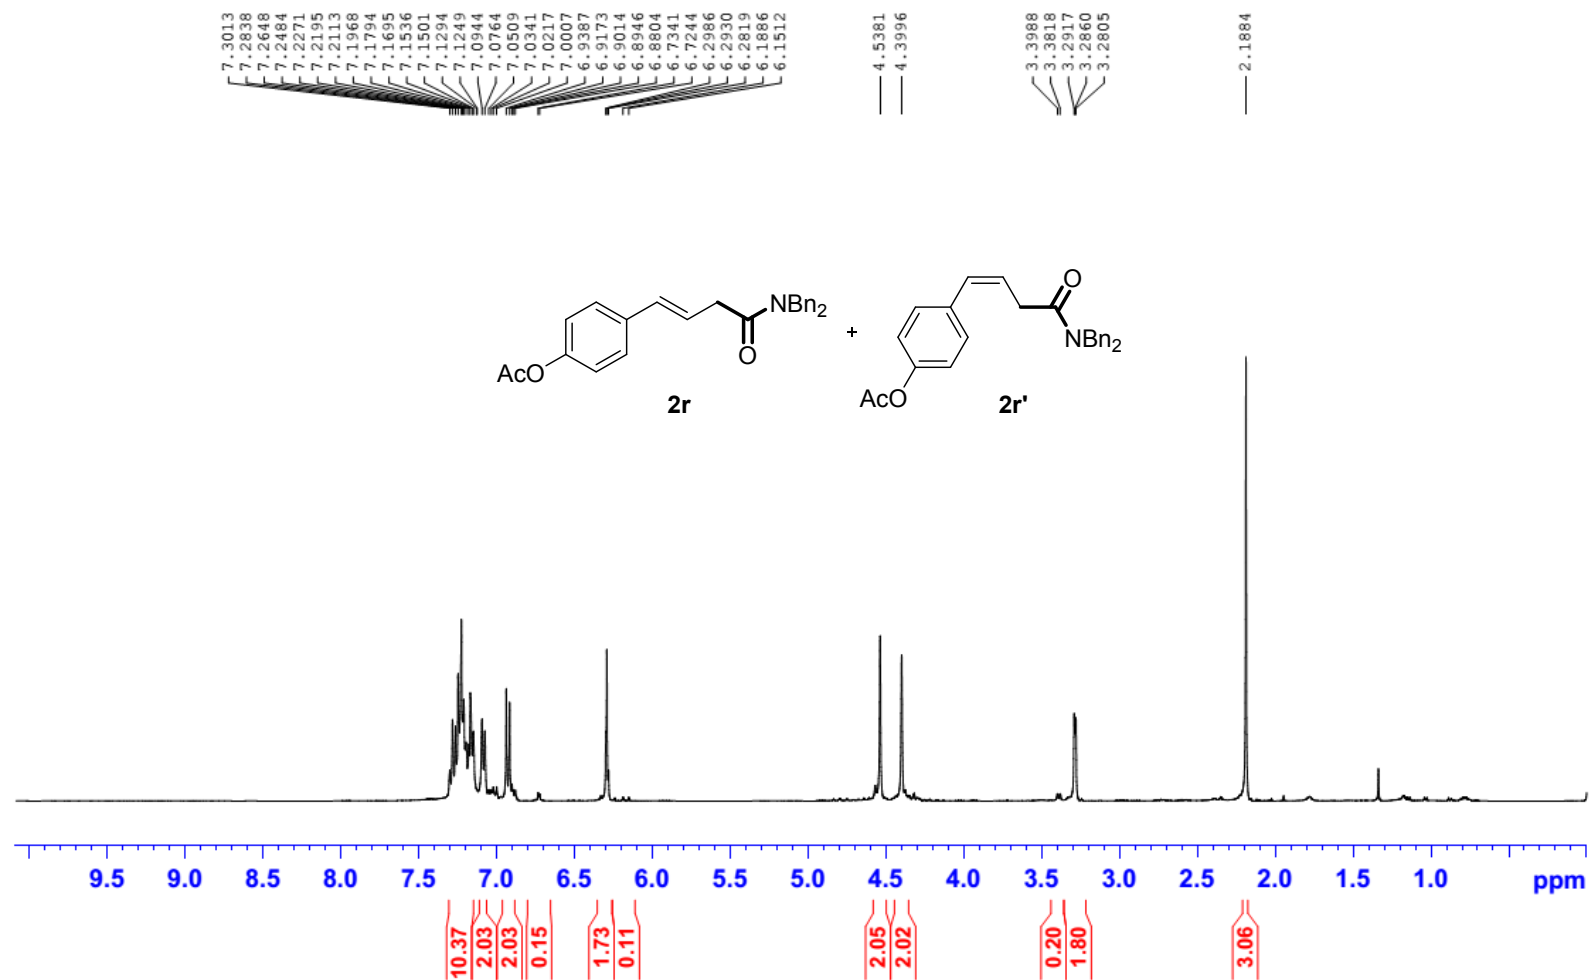

YH-140409-7-CNMR

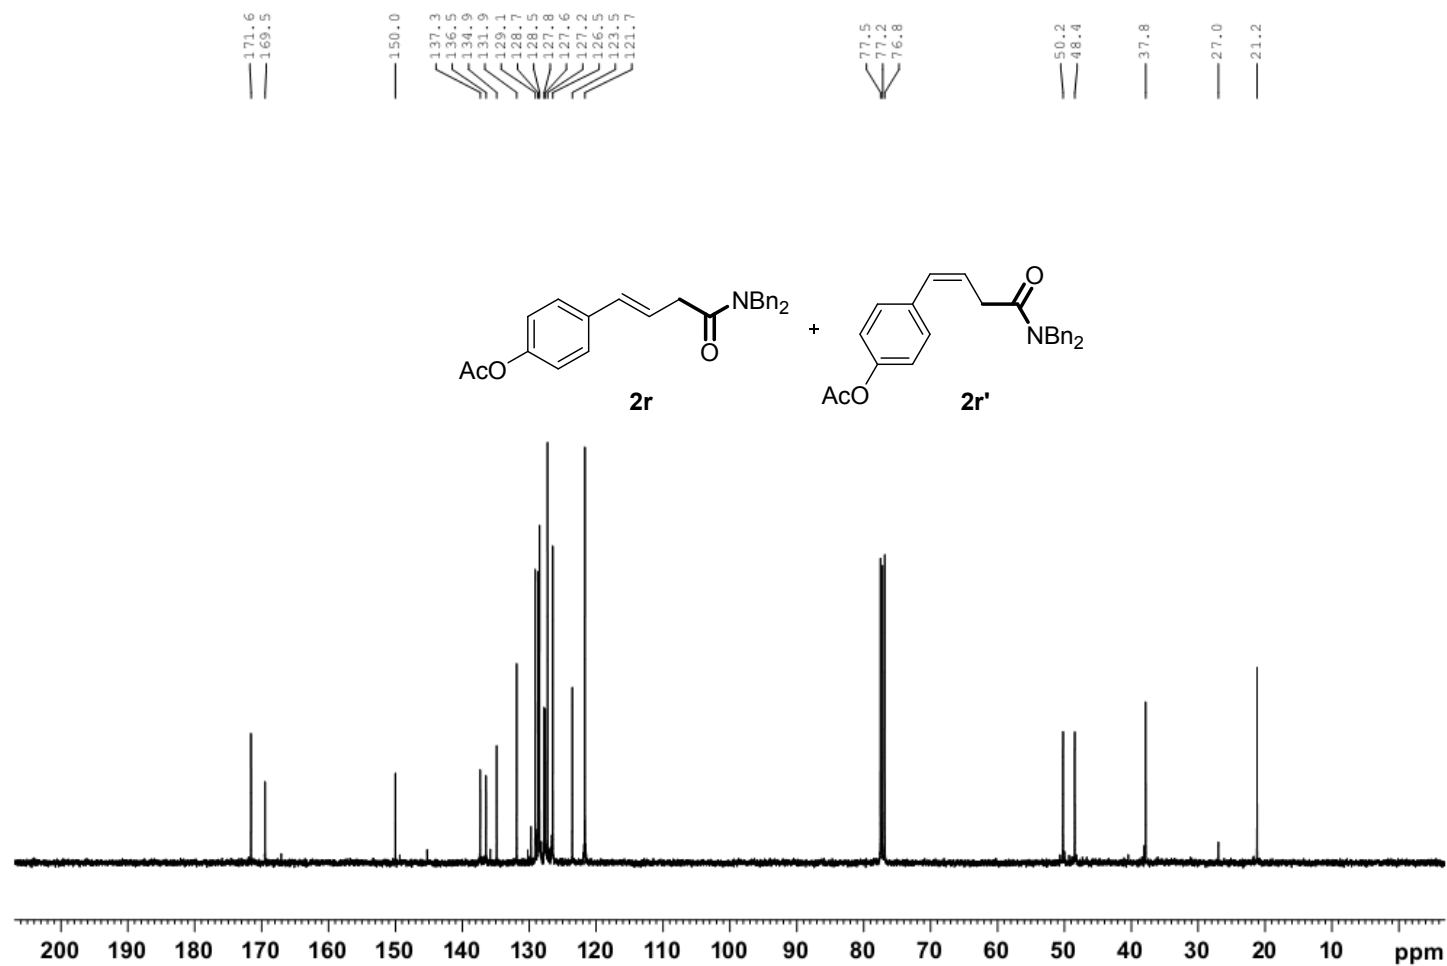



YH-140416-4-HNMR

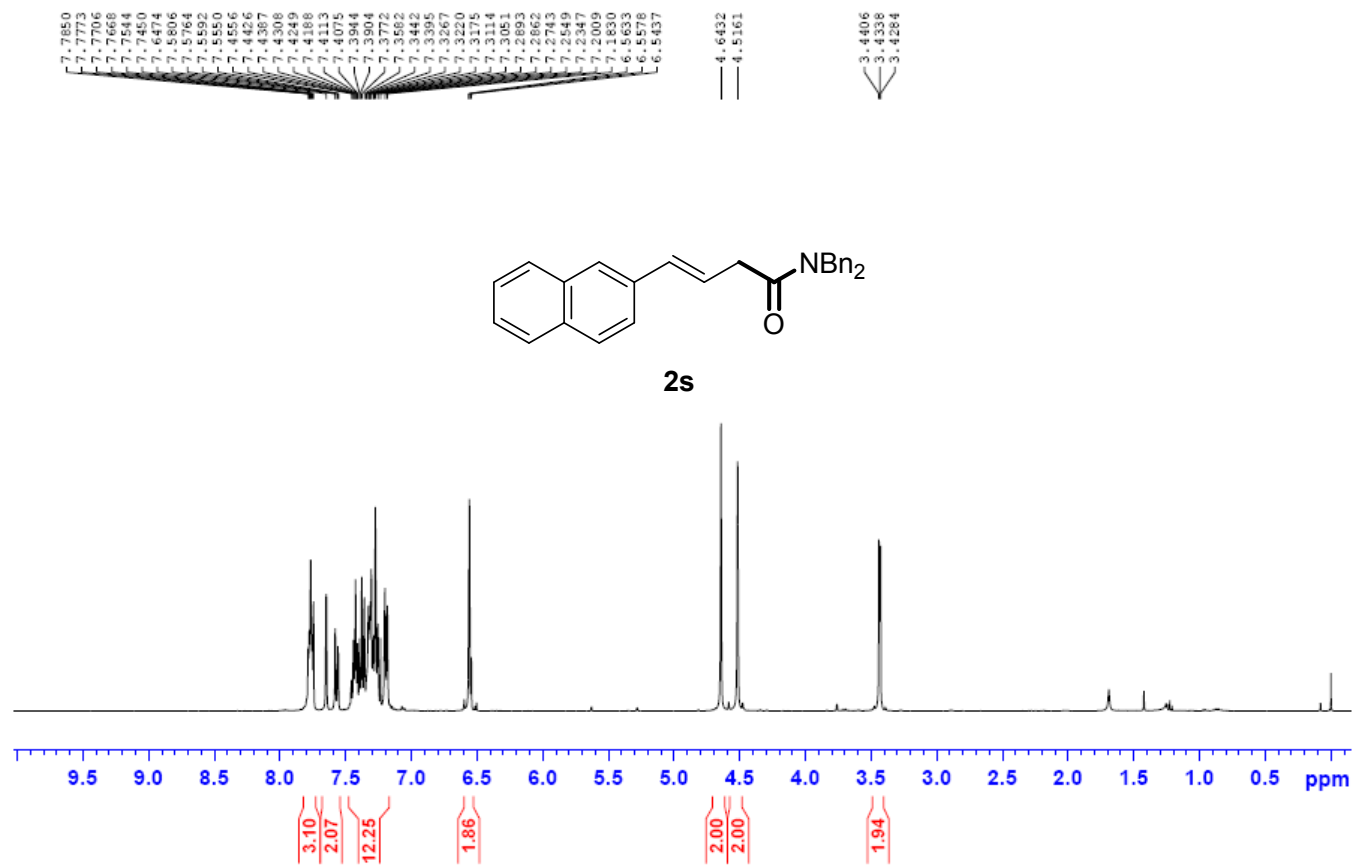

YH-140409-1-CNMR

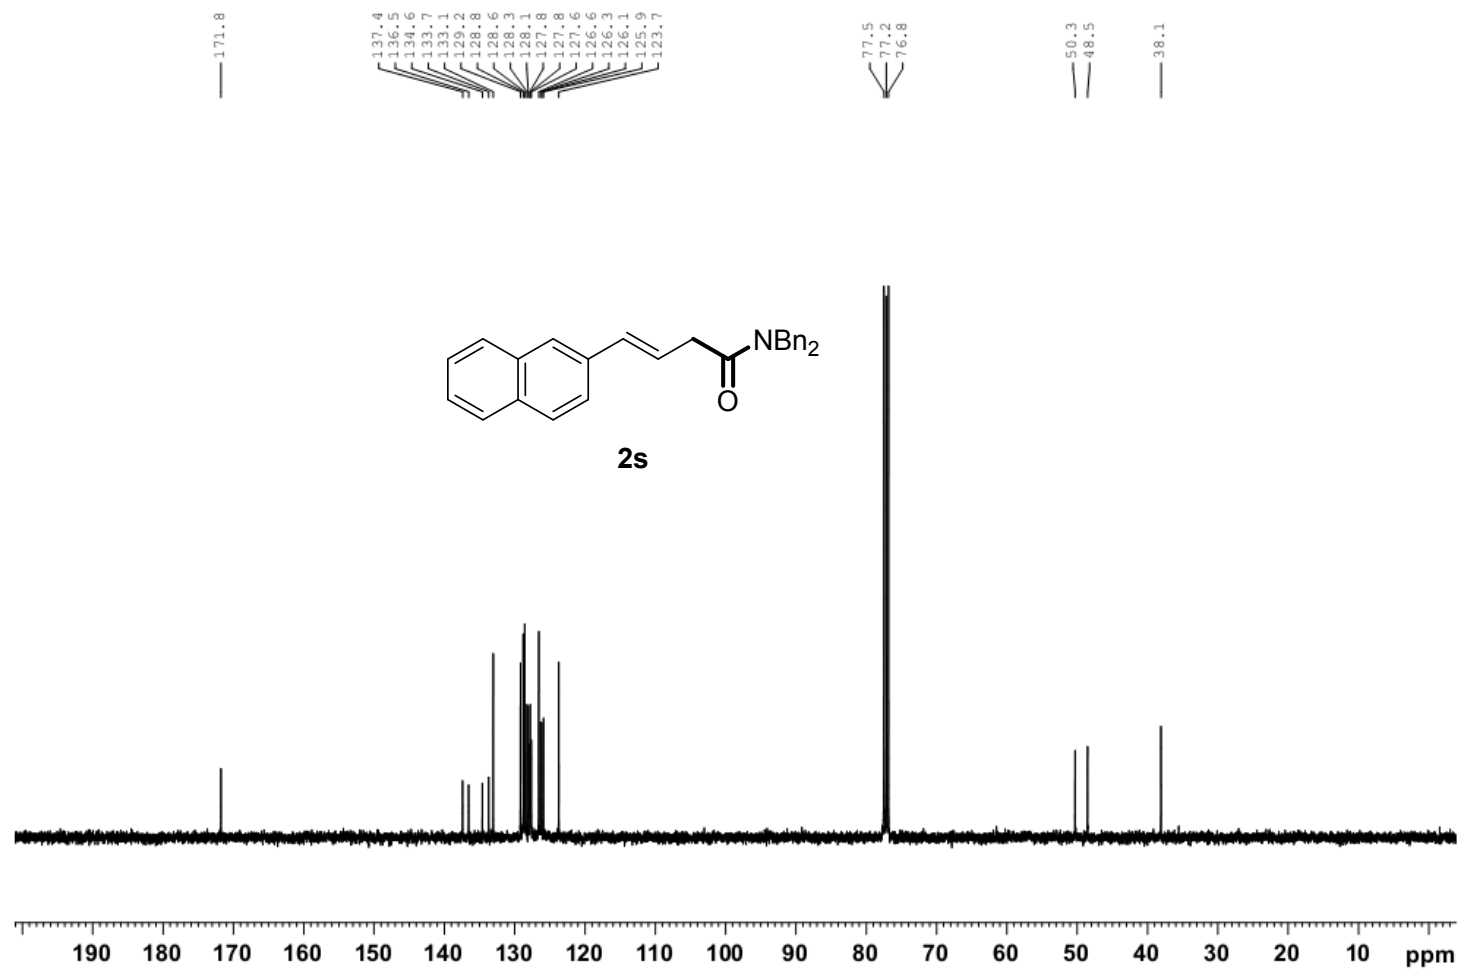

YH-140317-2-HNMR

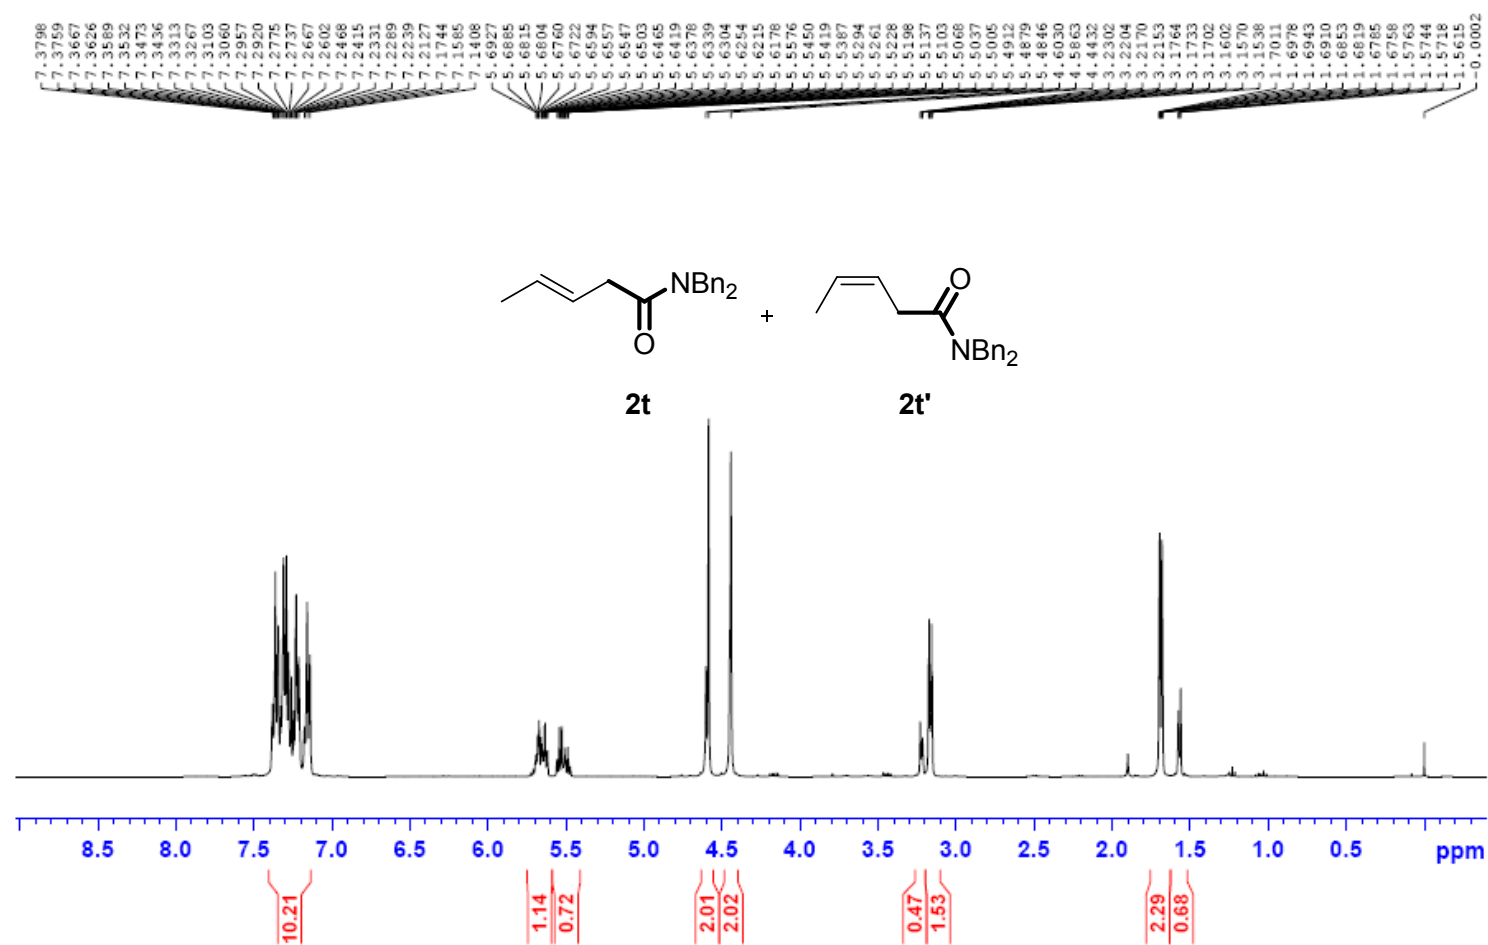

YH-140317-2-CNMR

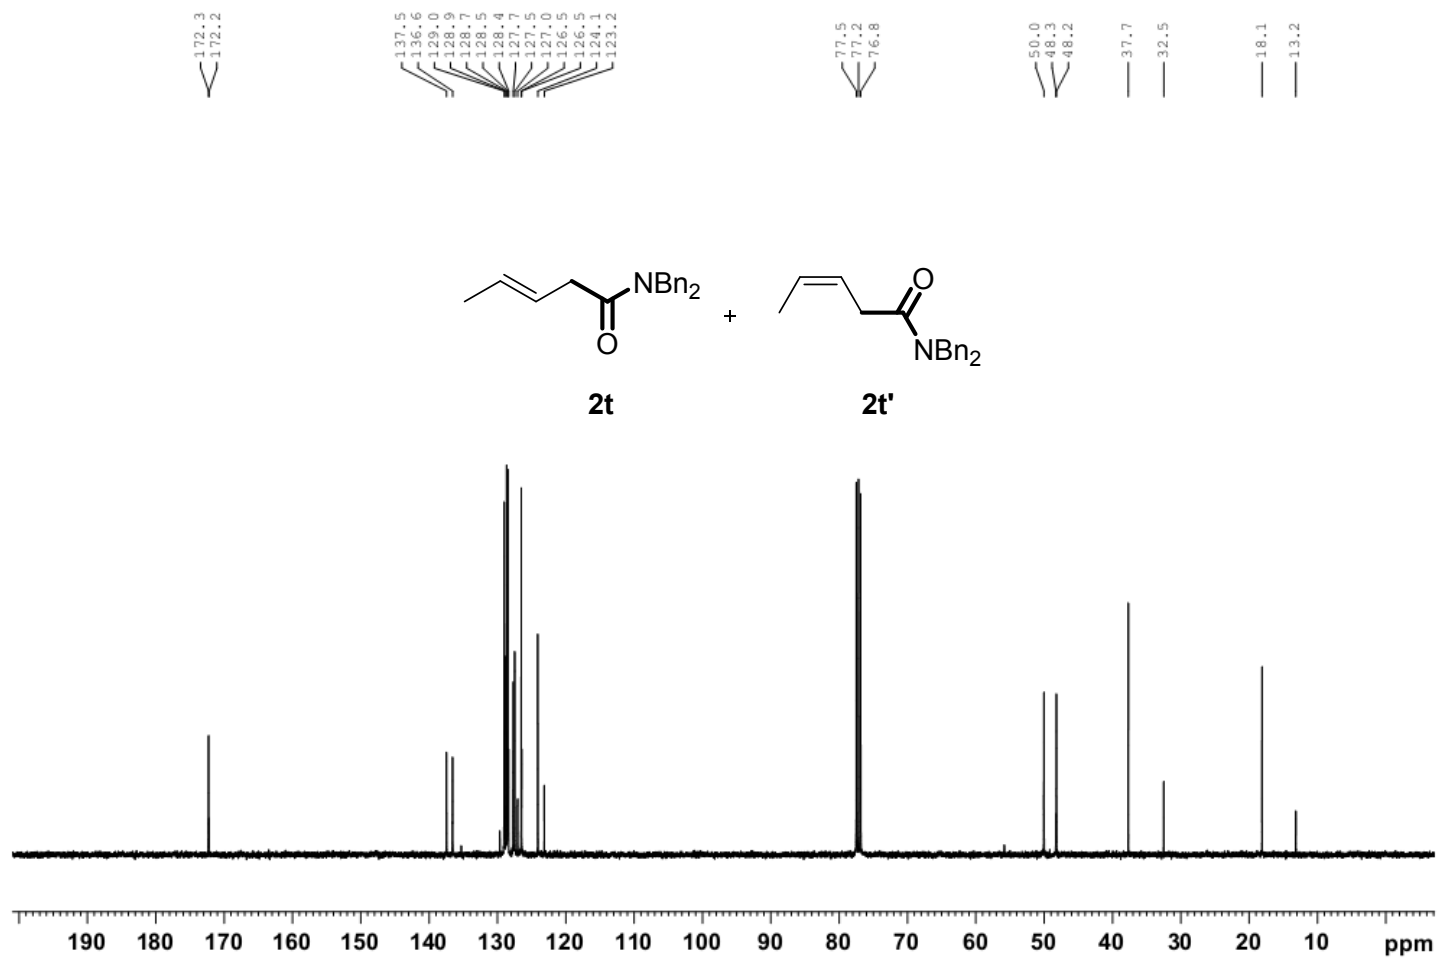

Supplement: c4ra13939a1.pdf [file c4ra13939a1.pdf]
